1 **Loss of genetic variation and sex determination system in North American**  
2 **northern pike characterized by whole-genome resequencing**

3 Hollie A. Johnson<sup>1\*</sup>, Eric B. Rondeau<sup>1\*</sup>, Ben J. G. Sutherland<sup>1,2</sup>, David R. Minkley<sup>1</sup>, Jong S. Leong<sup>1</sup>,  
4 Joanne Whitehead<sup>1</sup>, Cody A. Despins<sup>1</sup>, Brent E. Gowen<sup>1</sup>, Brian J. Collyard<sup>3</sup>, Christopher M.  
5 Whipps<sup>4</sup>, John M. Farrell<sup>5</sup>, Ben F. Koop<sup>1</sup>

6  
7 <sup>1</sup>Department of Biology, Centre for Biomedical Research, University of Victoria, Victoria, British  
8 Columbia, V8W 3N5, Canada

9 <sup>2</sup>Sutherland Bioinformatics, Lantzville, British Columbia, Canada V0R 2H0

10 <sup>3</sup>Alaska Department of Fish and Game, Division of Sport Fish, 1300 College Rd, Fairbanks, Alaska,  
11 99701-1599, USA

12 <sup>4</sup>Center for Applied Microbiology, Department of Environmental Biology, SUNY College of  
13 Environmental Science and Forestry, Syracuse, New York, 13210, USA

14 <sup>5</sup>Thousand Island Biological Station, Department of Environmental and Forest Biology, SUNY  
15 College of Environmental Science and Forestry, Syracuse, New York, 13210, USA

16

17

18 \*Authors contributed equally

19 Author for correspondence: BFK

20 Email: [bkoop@uvic.ca](mailto:bkoop@uvic.ca)

21

22 Running title: Population genomics of North American pike

## 23 **Abstract**

24 The northern pike *Esox lucius* is a freshwater fish renowned for having low genetic diversity but  
25 ecological success throughout the Northern Hemisphere. Here we generate an annotated chromosome-  
26 level genome assembly of 941 Mbp in length with 25 chromosome-length scaffolds using long-reads  
27 and chromatin capture technology. We then align whole-genome resequencing data against this  
28 reference to genotype northern pike from Alaska through New Jersey (n = 47). A striking decrease in  
29 genetic diversity occurs along the sampling range, whereby samples to the west of the North American  
30 Continental Divide have substantially higher diversity than populations to the east. As an example,  
31 individuals from Interior Alaska in the west and St. Lawrence River in the east have on average 181K  
32 and 64K heterozygous SNPs per individual, respectively (i.e., a SNP variant every 3.2 kbp and 11.2  
33 kbp, respectively). Even with such low diversity, individuals clustered with strong support within each  
34 population, and this may be related to numerous private alleles in each population. Evidence for recent  
35 population expansion was observed for a Manitoba hatchery and the St. Lawrence population (Tajima's  
36  $D = -1.07$  and  $-1.30$ , respectively). Non-uniform patterns of diversity were observed across the genome,  
37 with large regions showing elevated diversity in several chromosomes, including LG24. In populations  
38 with the master sex determining gene *amhby* still present in the genome, *amhby* is in LG24. As  
39 expected, *amhby* was largely male-specific in Alaska and the Yukon and absent southeast to these  
40 populations, but we also document some *amhby*(-) males in Alaska and *amhby*(+) males in the  
41 Columbia River. This indicates that rather than a discrete boundary after which *amhby* was lost in  
42 North America, there is a patchwork of presence of this system in the western region. These results  
43 support the theory that northern pike recolonized North America from refugia in Alaska and expanded  
44 following deglaciation from west to east, with probable founder effects resulting in loss of both neutral  
45 and functional diversity including the loss of the sex determination system.

46

47 **Keywords:** *Esox lucius*; genetic variation; genomics; long-read assembly; northern pike; population  
48 genomics; sex determination; whole-genome resequencing

## 49 **Introduction**

50 Historical population dynamics and contemporary genetic diversity and structure of freshwater fishes  
51 in the Northern Hemisphere have been significantly shaped by Pleistocene glacial cycles of expansion  
52 and retreat that occurred up to around 14,000 years ago (Bernatchez & Wilson, 1998; Skog et al., 2014;  
53 Wooller et al., 2015). Glacial advances resulted in large mortalities, range compressions to glacier  
54 edges, and isolation of populations into refugia. Glacial retreats resulted in formations of large  
55 postglacial lakes allowing rapid range recolonization across large geographic scales (see Bernatchez  
56 & Wilson, 1998). Northern pike *Esox lucius* (Order: Esociformes), with a distribution across much of  
57 the Northern Hemisphere in fresh and brackish water (Craig, 2008), was significantly impacted by  
58 these glacial cycles (Wooller et al., 2015). In eastern Eurasia, northern pike survived in a Siberian  
59 refugium and expanded into Beringia (Bachevskaja et al., 2019), which remained unglaciated during  
60 the Pleistocene and was a refugium for many freshwater species (reviewed by Wooller et al., 2015).  
61 Following glacial retreat, the Beringia refugium was the likely source for northern pike recolonization  
62 of Alaska (Crossman & Harington, 1970). However, Esocid ancestors of northern pike were in North  
63 America during the Paleocene (i.e., 56-66 mya) (Wilson, 1980), and therefore had a long history in the  
64 area prior to the glacial impacts (Wilson et al., 1992).

65 Genetic variation is considered pivotal for adaptation (Barrett & Schluter, 2008; Höglund,  
66 2009), but northern pike throughout their range have low genetic diversity (Skov & Nilsson, 2018).  
67 Genetic diversity of northern pike is particularly low in central North America (Bosworth & Farrell,  
68 2006; Miller & Kapuscinski, 1996; Rondeau et al., 2014; Senanan & Kapuscinski, 2000), in  
69 concordance with expectations due to glacial impacts on genomic diversity (Bernatchez & Wilson,  
70 1998) resulting in a ‘younger’ and more recently recolonized population (reviewed by Skog et al.,  
71 2014). Although northern pike also have low diversity elsewhere in their range, including in Europe  
72 (Nicod et al., 2004), higher levels than those observed in North America occur in Sweden (Sunde et  
73 al., 2022), China (Luan et al., 2021), and Siberia (Senanan & Kapuscinski, 2000). Globally, the  
74 generally low diversity is likely due to ice age population bottlenecks and founder effects, small  
75 effective population sizes, restricted gene flow between populations, and the role of the pike as an apex  
76 predator, including with cannibalistic tendencies (Seeb et al., 1987; Skog et al., 2014). This low genetic  
77 diversity and structure challenges fine-scale population structure characterization in northern pike in  
78 North America (Miller & Senanan, 2003; Senanan & Kapuscinski, 2000; Skog et al., 2014). In general,  
79 currently three main northern pike haplogroups exist across the Northern Hemisphere (Skog et al.,  
80 2014). One of these haplogroups is Holarctic, and is present across North America as the likely

81 expansion from an Alaskan, postglacial source described above (Wooller et al., 2015). Even with low  
82 genetic diversity, and involving only a few individuals, northern pike excel at accessing and colonizing  
83 new regions (Luan et al., 2021). Considering this historical context, and in addition to its value in sports  
84 fishing (DFO, 2012) and as a model for physiological, toxicological, and ecological studies (Forsman  
85 et al., 2015), the northern pike is a good model system to understand adaptability and resilience with  
86 low genetic diversity.

87 Northern pike has also been the focus of studies on mechanisms of sex determination. Pan and  
88 co-workers (2021) characterize global dynamics of the master sex determination (MSD) system in  
89 northern pike, where a male-specific duplicate of *anti-mullerian hormone*, termed *amhby*, was  
90 identified as the MSD gene in Europe, but has been lost in parts of North America. Furthermore, no  
91 replacement MSD system for *amhby*(-) populations in North America has been identified (Pan et al.,  
92 2021), which explains previous challenges in mapping sex in northern pike populations of eastern  
93 North America (see Rondeau et al., 2014). This MSD system variation is notable given that it is  
94 considered a single, circumpolar species (Grande et al., 2004). Teleosts are known to have high  
95 diversity and turnover of sex determination systems (Pan et al., 2019), and their sex determination can  
96 involve environmental factors (Devlin & Nagahama, 2002; Goto-Kazeto et al., 2006). As *amhby* is the  
97 MSD gene in Alaska, and is missing in other North America populations, this may indicate that it was  
98 lost during range expansion through bottleneck or founder effects from Alaska eastward (Pan et al.,  
99 2021). This evolving MSD system in northern pike adds to its value as a model species. Field and  
100 laboratory observations of skewed sex ratios in some North American populations do suggest an  
101 environmental effect on sex determination (Carbine, 1942; Clark, 1950; Huffman et al., 2014; Priegel  
102 & Krohn, 1975) although field-based estimates of sex ratio may contain biases (Casselmann, 1975).  
103 Finer-scale resolution of populations in North America will benefit the understanding of *amhby* loss  
104 and may provide more information to understand current or evolving mechanisms underlying sex  
105 determination in *amhby*(-) populations.

106 Genetic resources are available for northern pike including reference genome assemblies, a  
107 linkage map, and expressed sequence tag libraries (Leong et al., 2010; Pan et al., 2019; Rondeau et al.,  
108 2014), as well as genome assemblies of other *Esox*, *Dallia*, *Novumbra*, and *Umbra* spp. (Pan et al.,  
109 2021), further adding to the value of northern pike as a model. Short-read technology has provided  
110 much insight in ecology and evolution, but long-read technology such as PacBio and Oxford Nanopore  
111 (Eid et al., 2009; Stoddart et al., 2009) can provide a more contiguous assembly that increases the  
112 potential to fully characterize genes, repeat regions, and chromosomal structural elements (reviewed  
113 by Chaisson et al., 2015). This is particularly relevant for areas of high repeat content (e.g., Bongartz,

114 2019) or for polyploid species in order to resolve haplotypes (e.g., Aury et al., 2022; Sun et al., 2022;  
115 Yuan et al., 2021). Long reads require error-correction with short reads (e.g., Goodwin et al., 2015;  
116 Koren et al., 2012) or consensus building with sequencing depth (Chin et al., 2013). Furthermore, new  
117 advances in scaffolding can facilitate further improvements in contiguity for super scaffolds and long-  
118 range haplotypes including chromatin conformation capture (Dekker et al., 2002) as applied in  
119 chromatin proximity ligation methods (Dudchenko et al., 2017; Mostovoy et al., 2016; Putnam et al.,  
120 2016).

121 In the present study we provide a new genome assembly for northern pike using long-read  
122 technology and chromatin conformation capture methods, using naming conventions consistent with  
123 the original assembly (Rondeau et al., 2014). We then use the improved assembly to characterize the  
124 genomic diversity of northern pike throughout North America using whole-genome resequencing with  
125 a particular focus on the region from Alaska through British Columbia due to its importance regarding  
126 the loss of *amhby* (Pan et al., 2021). Furthermore, we characterize the intrachromosomal variation in  
127 polymorphic and repetitive element content. Alongside this characterization of genomic variation, we  
128 use recently developed (Pan et al., 2021) and newly developed sex markers combined with histology  
129 to identify which populations have *amhby*(+) males. Collectively, this work improves our  
130 understanding of the loss of genomic variation and MSD function in a west-to-east pattern in North  
131 America, likely related to the expansion and recolonization of northern pike into North America.

132

## 133 **Methods**

### 134 *Reference genome sampling, sequencing, and assembly*

135 Northern pike were sampled near Castlegar, BC in September 2017 as part of an invasive species  
136 removal project in the Canadian portion of the Columbia River. Following euthanization, the liver  
137 tissue from a female individual was removed by dissection and frozen on dry ice for 48 hours before  
138 long-term storage at -80°C.

139 High-molecular weight DNA was extracted from the liver using a modified dialysis method as  
140 follows. Approximately 550 mg of frozen tissue was ground into a powder using liquid nitrogen and  
141 mortar and pestle. The powder was transferred to a 5 ml lo-bind tube (Eppendorf), along with 3600 µl  
142 buffer ATL, 400 µl proteinase K solution and 40 µl RNase A solution (QIAGEN), followed by  
143 digestion at 56°C for 3 hours, with rotation at approximately 4 RPM. The homogenate was split equally  
144 into two 5 ml tubes, where a phenol-chloroform-isoamyl alcohol (25:24:1) purification was performed  
145 three times per tube, followed by a chloroform-isoamyl alcohol (24:1) purification. In each stage, one

146 volume of organic solvent was mixed with one volume of aqueous solution, mixed by slow inversion  
147 for three minutes, then spun for 15 minutes at 5000xg for phase separation. The aqueous top layer was  
148 then transferred slowly to a new tube using a 1000  $\mu$ l wide-bore pipette tip. Subsequently, 2  $\mu$ l of  
149 RNase A (20 mg/ml; QIAGEN) was added to the aqueous solution and incubated for one hour at room  
150 temperature, then 5  $\mu$ l of proteinase K (20 mg/ml) was added and incubated overnight at 4°C. Finally,  
151 approximately 750  $\mu$ l was obtained from each tube (i.e., 1,500  $\mu$ l total) and transferred to a Spectra/Por  
152 Float-A-Lyzer G2 1000 kD (pink) dialysis device (Spectra/Por). Dialysis was performed in 1 L of 10  
153 mM Tris-Cl (pH 8.5) at 4°C with gentle mixing for one week, changing the buffer five times throughout  
154 the process. DNA quantity was determined by Qubit v2.0 (Life Technologies) and quality by 0.6%  
155 agarose gel electrophoresis at 60 Volts. Bands greatly exceeded the largest ladder band of 40 kb with  
156 no visible shearing.

157 Subsequent library preparation and sequencing was performed by the McGill University and  
158 Genome Quebec Innovation Centre. In brief, PacBio sheared large-insert libraries were constructed  
159 following standard protocols and sequenced across eight SMRT cells on a PacBio Sequel, generating  
160 76 Gbp of data. An additional library was constructed using the same input genomic DNA for 10X  
161 chromium sequencing following standard protocols and sequenced on one lane of Illumina HiSeqX  
162 PE150. A third library preparation method was conducted at the University of Victoria using the  
163 Proximo Animal Hi-C kit (Phase Genomics) following the Phase Genomics protocol 1.0 with adapter  
164 barcode N702 using 0.2 g of the liver tissue and sequenced within a single lane of Illumina HiSeq4000  
165 PE100.

166 PacBio data was assembled using Canu v1.8 (Koren et al., 2017). All subreads were used, and  
167 a genome size of 0.95 Gbp was estimated as input. All stages were run with SLURM scheduling on  
168 the Compute Canada heterogeneous cluster (Cedar). Options *stageDirectory* and  
169 *gridEngineStageOption* were used for optimal on-node storage at heavy input/output stages. Default  
170 settings were used except that *ovlMerThreshold* was set to 2000, *corMhapSensitivity* was set to normal,  
171 *correctedErrorRate* to 0.085, and *minReadLength* to 2500 to reduce runtime and/or to use  
172 recommendations for Sequel data as per software guidelines. Following the initial assembly, Arrow  
173 v2.2.2 was used in SMRTlink (6.0.0.47841) to polish with PacBio data, using the ArrowGrid wrapper  
174 (Koren et al., 2017). The ArrowGrid pipeline was run a total of three times, then the output was  
175 subjected to a round of polishing using Pilon v1.22 (Walker et al., 2014) using the 10X chromium data  
176 that had been pre-processed using Longranger v2.2.2 (10X Genomics) to remove barcodes.



177 Scaffolding occurred in three stages. In the first stage, Hi-C data was used to scaffold the  
178 assembly with SALSA2 (Ghurye et al., 2017; Ghurye et al., 2019). Hi-C data was first prepared and  
179 aligned to the input genome following recommendations by Arima Genomics (Arima Genomics,  
180 2023). In brief, paired-end reads from the Hi-C library were separately aligned to the genome using  
181 BWA mem 0.7.13-r1126 (Li, 2013), then sorted, merged and filtered with SAMtools v.1.8 (Li et al.,  
182 2009), Picard v.2.9.0-1-gf5b9f50 (Broad Institute, 2023), and bedtools v.2.27.0 (Quinlan & Hall,  
183 2010). SALSA2 was then run with options *-m yes* and *-e GATC* to identify misassemblies in the input  
184 assembly and to indicate the applied restriction enzyme, respectively, and indicating the post-Pilon  
185 reference and the bed file output by the Arima pipeline.

186 In the second scaffolding stage, the Tigmint-ARCS-LINKS pipeline was applied. In brief,  
187 Tigmint v1.1.2 (Jackman et al., 2018) was run using the ARCS pipeline to run all three stages. The  
188 Tigmint portion of the pipeline was run with default parameters. For ARCS v1.0.5 (Yeo et al., 2017)  
189 and LINKS v1.8.6 (Warren et al., 2015), parameters were used as default except *-l* (i.e., the minimum  
190 number of links, or k-mer pairs, required to compute a scaffold; default = 5), and *-a* (i.e., the maximum  
191 link ratio between the two best contig pairs; default = 0.3), which were tested for all combinations of  
192  $l=5-10$ ,  $a=0.1-0.9$ . Optimization focused on increasing N50 but also balancing the number of misjoined  
193 scaffolds observed in the third stage of scaffolding with Hi-C (*see below*). The selected parameters  
194 (i.e.,  $l = 8$ ;  $a = 0.2$ ) had a maximum of two or three visible misjoins. This stage introduced some short  
195 contigs (< 200 bp) assembled within scaffolds without meaningful gap sizes, and these were removed  
196 using *sed*, with all remaining gaps resized to strings of 100 Ns. The small number of scaffolds that  
197 were smaller than 1 kbp (i.e., fewer than 100 scaffolds) were removed using *fastx* of Bioawk (Li, 2017).

198 In the third scaffolding stage, Hi-C data was re-aligned to the genome following the scaffolding  
199 stages above using Juicer v.1.5.6 (Durand, Shamim, et al., 2016) with flags and arguments *-s* Sau3AI  
200 (i.e., the restriction enzyme applied) and *-y* to include the restriction site file, as well as *-S* early to  
201 indicate early exit of the program. The resultant output (i.e., merged\_nodups.txt) was used with 3d-  
202 dna v.180922 (Dudchenko et al., 2017) using parameters *-i* 50000 (i.e., the minimum size of contigs to  
203 scaffold) and *-r* 0 (the number of iterative rounds for misjoin correction). The assembly was visualized  
204 after scaffolding using Juicebox v1.8.8 (Durand, Robinson, et al., 2016) to identify and split mis-  
205 assemblies, and to identify, order, and orient linkage groups (LGs). LG-like groups were oriented such  
206 that the greatest density of inter-chromosomal contacts was at the 5' end of each LG. Using  
207 *juicebox\_assembly\_converter.py* (Phase Genomics), NCBI AGP files were generated. The newly  
208 generated LGs were compared to the northern pike v.1.0 assembly (Rondeau et al., 2014) using LastZ  
209 (Harris, 2007) visualized in Geneious (Kearse et al., 2012) using default parameters, and the AGP file

210 was manually edited to keep naming consistent to the v.1.0 assembly. The genome was then submitted  
211 to NCBI (see *Data Availability*).

212 Genome annotation was conducted using the NCBI Eukaryotic Annotation pipeline v.8.2 under  
213 annotation release 103. Genome completeness was evaluated using BUSCO v.4.0.2 with both  
214 Actinopterygii and Vertebrata odb10 datasets (Seppey et al., 2019). Analysis of repeat content used  
215 the same methods and custom repeat library as previously described (Rondeau et al., 2014).

216

### 217 *Population genomics: sampling, sequencing, and analysis*

218 Northern pike tissue samples (n = 47) were obtained from across Canada and the northern United States  
219 as provided by collaborators and hatcheries (see Table 1; Figure 1). Fish from the upper St. Lawrence  
220 River were collected and processed following a protocol approved by the SUNY ESF Institutional  
221 Animal Care and Use Committee. Alaskan Minto Flats samples used for sex marker validation (see  
222 below) were provided as fin clips in 95% ethanol by the Alaska Department of Fish and Game  
223 following approved state and departmental regulations and protocols. All other tissues were either  
224 archival, opportunistic sampling of fishery harvest or government purposes (e.g., invasive species  
225 control), and therefore did not require ethical review by the University of Victoria in accordance with  
226 the Canadian Council on Animal Care Guidelines on the care and use of fish in research, teaching and  
227 testing (s4.1.2.2; CCAC, 2005).

228 DNA was extracted from a variety of tissues using DNEasy Blood and Tissue Kit (QIAGEN)  
229 following the manufacturer's protocols, then quantified by Nanodrop ND-1000 (ThermoFisher) and  
230 Qubit v2.0 (Life Technologies). Samples were sent to McGill University and Genome Quebec  
231 Innovation Centre for library preparation and sequencing. Most of the samples (i.e., 35 of 47)  
232 underwent PCR-free whole genome shotgun sequencing. The ten samples from the Chatanika River  
233 had insufficient quantities for PCR-free libraries and therefore were sequenced via PCR shotgun  
234 sequencing. All 45 of these libraries were sequenced on an Illumina HiSeqX Ten in paired-end 150 bp  
235 reads with between five and seven samples sequenced per lane. The two remaining samples (i.e.,  
236 Castlegar and Charlie Lake, BC) were used for reference genome assembly, with the Castlegar  
237 individual being the focus for the final v.4.0 assembly. Due to the focus on detecting sex determination  
238 loci, lanes were designated as sex specific as much as possible to reduce the impact of potential index  
239 switching between sexes.

240 Read processing and variant calling was based on GATK's best practices (GATK v.3.8-0-  
241 ge9d806836; DePristo et al., 2011; McKenna et al., 2010; Poplin et al., 2018; Van der Auwera et al.,



242 2013). In brief, paired-end reads were aligned to the latest northern pike genome (*described above*;  
243 GCF\_004634155.1) using bwa-mem v.0.7.13-r1126 (Li, 2013). Alignment files were converted to bam  
244 format, sorted, and indexed by position using SAMtools v.1.3. Sequencing platform and multiplexing  
245 layout metadata was used to mark duplicates using Picard v.2.17.11 to flag for downstream genotyping.  
246 The two samples used for reference genome assemblies (i.e., Castlegar and Charlie Lake, BC) had 5-  
247 7x deeper coverage than the rest of the samples, and so they were down-sampled (i.e., reads were  
248 randomly subsampled to the targeted coverage of 25X for Charlie Lake and 20X for Castlegar) using  
249 SAMtools view with the *-s* flag. Nucleotides in all bam files were re-calibrated according to GATK's  
250 recommendations for non-model organisms.

251 Variants were called from re-calibrated bam files independently per sample using the  
252 *HaplotypeCaller* of GATK in GVCF mode, then combined as a cohort using the *GenotypeGVCF*  
253 function of GATK to produce a VCF file containing 1,910,789 SNPs and insertion/deletions (indels)  
254 for all 47 samples. The 1,363,731 SNPs within this VCF were then extracted and filtered (see Table  
255 2). A hard filter was applied using GATK to remove variants according to the following cutoffs or  
256 parameters: quality by depth = 2; fisher strand bias = 60; root mean square mapping quality = 30,  
257 mapping quality rank sum test = -12.5; and read position rank sum test = -8.0. Additional quality  
258 control filters were applied using VCFtools v.0.1.15 (Danecek et al., 2011) including removing sites  
259 where more than 10 individuals had missing data (*--max-missing-count* 10) or those with no minor  
260 alleles observed (*--mac* 1). Sites were further required to have at least one homozygous call, either  
261 reference or alternate. The resultant VCF file with 1,127,943 variants was used for the downstream  
262 analysis, although further filtration was conducted for specific analyses as discussed in individual  
263 sections below.

264 The numbers of variant calls per individual were summarized and visualized in R (R Core  
265 Team, 2023) using vcfR v.1.14.0 (Knaus & Grünwald, 2017) and dplyr v.1.1.4 (Wickham et al., 2023).  
266 Genotype counts per site were obtained using the *VariantsToTable* function of GATK for  
267 heterozygotes, homozygous reference, homozygous variant, and no call, as well as the total number of  
268 variants and samples called per site. To obtain per site genotype frequencies, each category was divided  
269 by the number of samples called. Observed heterozygosity ( $H_{OBS}$ ) was calculated by reading in the  
270 VCF into R, converting it to genind format using vcfR then to genlight format to calculate  $H_{OBS}$  with  
271 the function *gl.report.heterozygosity* using dartR v.2.9.7 (Gruber et al., 2018). Private alleles per  
272 population were calculated using the *private\_alleles* function of poppr v.2.9.4 (Kamvar et al., 2014).  
273 Tajima's D in bin sizes of 10,000 were calculated using bcftools (Danecek et al., 2021).

274 A maximum likelihood tree based on genome-wide SNPs was generated using SNPhylo  
275 v.20140701 (Lee et al., 2014) using default parameters and with 1,000 bootstraps. The resulting tree  
276 was visualized using FigTree version 1.4.3 (Rambaut, 2016), and rooted by midpoint. A discriminant  
277 analysis of principal components (DAPC) was performed with bi-allelic genome-wide SNPs using  
278 adegenet v.2.1.1 (Jombart, 2008; Jombart & Ahmed, 2011) in R. The *find.clusters* function of adegenet  
279 was used to determine the appropriate number of clusters based on the lowest Bayesian Information  
280 Criterion value when all principal components were kept, and DAPC was conducted on these groups,  
281 retaining 24 principal components and three discriminant functions. The *snpzip* function with the Ward  
282 clustering method was used to list SNPs with the greatest contribution to each of the three discriminant  
283 axes identified.

284

### 285 *Characterizing diversity across chromosomes*

286 The genome assembly was unwrapped using custom python script *fasta\_unwrap.py* (E. Normandeau,  
287 Scripts; see *Data Availability*) and subset to only contain chromosomes. Chromosome lengths were  
288 calculated using *fasta\_lengths.py* (E. Normandeau, Scripts). The genome was then indexed using  
289 samtools, and a bed file containing 1 Mbp windows was prepared using the *makewindows* function of  
290 bedtools. The number of variants per window for each chromosome was then calculated using the  
291 *coverage* function of bedtools. The distribution of variants per window for all windows was then used  
292 to determine the minimum number that would be considered an outlier (i.e., third quartile + 1.5x the  
293 interquartile range) using the *boxplot.stats* function of R, and the number of variants per window and  
294 the mean number of variants per kbp per chromosome were plotted using custom scripts in R (see *Data*  
295 *Availability*).

296

### 297 *Empirical sex-linked variants and genotypes in resequencing data*

298 The identification of k-mers associated with sex was performed on the resequenced populations that  
299 had at least three females and three males (i.e., Chatanika River (CHT), Manitoba (WHI), New Jersey  
300 (HCK), and New York (SLA); see Table 1). Raw reads were concatenated and then all possible 31mers  
301 were extracted to form a master list of k-mers using Jellyfish v.2.2.6 (Marçais & Kingsford, 2011)  
302 running on Compute Canada. The master list was then used to query the reads of each individual  
303 sample using Jellyfish to count all present 31mers. A sex-specific analysis was then conducted whereby  
304 females and males were compared within each population. Sex-specific k-mers were considered as  
305 those sequences for which all of the opposite sex in the population had two or fewer copies (to allow

306 for sequencing errors), and the target sex individuals all had at least one k-mer and the sum of all males  
307 had more than seven instances of the k-mer. The resulting sex-specific k-mer sets for each population  
308 were mapped back to the reference genome using bwa-aln v.0.7.13-r1226 (Li, 2013). Following the  
309 alignment, the number of sex-specific k-mers per population were counted in 10 kb windows across  
310 the genome using bedtools v2.26.0 (Quinlan & Hall, 2010) and plotted in R v.3.5.3 using ggplot2  
311 (Wickham, 2016).

312 Second, a genome-wide association analysis was performed using sex as the phenotype. The  
313 individuals with sex phenotype data were extracted from the VCF. This extraction also included a filter  
314 to keep variants with a minor allele count of at least two (i.e., *--mac 2*), resulting in the analysis of 17  
315 females and 21 males. The analysis was performed using plink v.1.9b\_5.2-x86\_64 (Purcell et al., 2007)  
316 using the *fisher-midp* option to run Fisher's exact tests and output p-values. The  $-\log(p\text{-value})$  of each  
317 SNP was visualized in a Manhattan plot using qqman v.0.1.4 (Turner, 2014). Significant associations  
318 were considered when Bonferonni corrected  $p \leq 0.05$ .

319 Third, a DAPC was conducted using sex as the differentiating variable using all resequenced  
320 individuals with sex phenotypes within populations and defined groups from PCA and DAPC (*see*  
321 *above*) in adegenet. Population and group-specific SNPs were extracted from the VCF file. Each group  
322 was filtered independently using a custom script in R to remove variants that were not expected to be  
323 related to the sex determination system (i.e., homozygous alternate variants). These variants were  
324 removed because the reference genome is female and the sex determination system expected to be XY,  
325 and therefore the homozygous alternate variants were not expected to be part of this system. The  
326 remaining sites were those with homozygous reference and heterozygous genotypes. Subsequently, the  
327 DAPC analysis was performed on each subset. Output loadings tables were inspected for genotypes  
328 where all males or all females were heterozygous. From this information, lists of genomic locations  
329 with putatively sex-specific signatures were generated for each population. Histograms of sex-specific  
330 SNP occurrences were then generated along LGs using ggplot2.

331

### 332 *Sex markers and histology*

333 PCR-based inspection for genetic sex markers was conducted for individuals used in resequencing (*see*  
334 *above*), as well as additional samples obtained from Castlegar, BC ( $n = 2$  females and 5 males) and  
335 from the Minto Flat region of Alaska, USA ( $n = 6$  females, 14 males, 1 undetermined). PCR used  
336 primers designed to amplify regions of *amhby* (i.e., SeqAMH1-4 and ConserveAMH1-1; Pan et al.,  
337 2021), as well as newly developed primers from this study (i.e., set\_24.5; Table S1). The set\_24.5

338 primers amplify a 500 bp amplicon in both sexes, and an additional 250-300 bp amplicon specifically  
339 in genetic males using a nested primer pair based on male-specific SNPs. PCR was conducted using 2  
340 mM MgCl<sub>2</sub>, 0.2 mM dNTPs, 1X reaction buffer, 0.25 units of Taq polymerase (Promega), 0.5 μM of  
341 each primer, 50-100 ng of DNA, a remaining volume of molecular grade water up to 10 μl total  
342 reaction volume. The nested primer pair used 0.2 μM forward primer instead of 0.5 μM and  
343 included 0.3 μM of the probe. All PCR used the following thermal regime: 95°C for 5 min., 35  
344 cycles of 95°C for 0.5 min., 0.5 min. anneal, 72°C extension for 1 min. (or 0.5 min. for set\_24.5),  
345 and a final 10 min. extension at 72°C. PCR products were visualized on 1% agarose gels and scored  
346 as female, male, or undetermined.

347         Histological determination of phenotypic sex was conducted using gonadal tissue from the  
348 Minto Flats and the St. Lawrence River populations. In brief, Minto Flats samples were saturated with  
349 a 1:1 solution of 100% ethanol:LR White resin (hard grade) for 24 hours, then with pure LR White for  
350 24 hours (resin replaced fresh after 6 hours). Each sample was then placed in separate gelatin capsules  
351 with fresh catalyzed LR white and polymerized at 60°C for 24 hours. Samples were cut to 1-micron  
352 sections, stained with Richardson's LM stain, and examined microscopically. St. Lawrence River  
353 samples were preserved in Davidson's solution for 48 hours, transferred to 70% ethanol prior to  
354 histological processing as described above. Following processing, tissues were embedded in paraffin  
355 wax and 5-micron sections were cut and stained with hematoxylin and eosin (H&E).

356

## 357 **Results**

### 358 **Genome assembly and annotation**

359 A northern pike female was sampled from the Canadian portion of the Columbia River at Castlegar,  
360 British Columbia (BC) and DNA was extracted from liver tissue to preserve high molecular weight  
361 genomic DNA. The DNA from this individual was sequenced to approximately 80X depth using 8  
362 SMRT cells on a Pacific Biosciences Sequel instrument. The initial contig-level assembly generated  
363 by Canu (see *Methods*) yielded a total length of 939.0 Mbp in 1,258 contigs (contig N50: 3.9 Mbp).  
364 Polishing and scaffolding occurred in several stages as described in brief here (see detailed description  
365 in *Methods*). First, Hi-C data was applied to the assembly resulting in 941 scaffolds (scaffold N50:  
366 18.8 Mbp). Second, 10X Chromium data was applied to the assembly, which split problematic contigs  
367 and allowed for additional scaffolding. The error correction step increased the number of contigs to  
368 1,395 and reduced contig N50 (contig N50: 3.4 Mbp), but the additional scaffolding increased the  
369 scaffold N50 (scaffold N50: 23.3 Mbp). Third, the Hi-C data was further applied and manually

370 reviewed to yield a total of 811 scaffolds (final scaffold N50: 37.6 Mbp; Figure S1). This final northern  
371 pike assembly (v.4.0) is 941 Mbp in length, with a maximum scaffold length of 52.6 Mbp, and includes  
372 25 scaffolds of the expected chromosome lengths. In addition, the assembly contains 785 unplaced  
373 scaffolds with a total length of 23 Mbp.

374 The 25 chromosome-length scaffolds were then assigned to the 25 linkage groups of northern  
375 pike (Rondeau et al., 2014). Linkage groups were oriented by density of inter-chromosomal contacts,  
376 where the greatest density of repeat elements was oriented to the 3' end of the chromosomes (Figure  
377 S2). This fits with the original orientation by Rondeau and co-workers (2014), but should be noted that  
378 the centromeres for the linkage map and assembly are therefore positioned at the 3' ends of all LGs or  
379 chromosomes. A full inventory of observed repeat elements and their percentages is shown in Table  
380 S2. The mitochondrial genome was identified by BLAST alignment of the previous assembly  
381 (NC\_025992.1; Rondeau et al., 2014) against the present assembly. Once identified, the mitochondrial  
382 genome was manually circularized. The v.4.0 assembly has been submitted to NCBI under assembly  
383 accession GCA\_004634155.1 (see *Data Availability*).

384 Annotation of the assembly was performed by the NCBI eukaryotic genome annotation  
385 pipeline using RNA-sequencing data (Pan et al., 2019; Rondeau et al., 2014) and EST data (Leong et  
386 al., 2010). This identified 24,843 protein-coding genes. A BUSCO analysis found that 95.4% and  
387 97.1% of the Actinopterygii (odb10) and Vertebrate (odb10) genes were complete, respectively.  
388 Relative to the former database with 3640 genes, 94.1% (i.e., 3426) were identified as single copies,  
389 and only 1.3%, 1.3%, and 3.3% were duplicated, fragmented, or missing, respectively.

390

### 391 **Genetic variation and population genomics**

392 Northern pike were obtained for whole-genome resequencing from across North America (Figure 1;  
393 Table 1). Samples included those from Chatanika River (CHT) in Interior Alaska, USA (n = 10), Yukon  
394 River at Hootalinqua (HOO) in the Whitehorse Region of the Yukon Territories, Canada (n = 5),  
395 Palmer Lake (PAL) in northwestern British Columbia (BC; n = 4), Charlie Lake (CHA) in northeastern  
396 BC (n = 1), Columbia River at Castlegar (CAS) in southeastern BC (n = 1), Whiteshell Hatchery (WHI)  
397 in Manitoba (n = 6), the St. Lawrence River (SLA) off New York State (n = 11), and at Hackettstown  
398 Hatchery (HCK) of New Jersey, USA (n = 9). In total, this included 17 phenotypic females, 21 males,  
399 and nine individuals with undetermined sex (n = 47 total; Table 1). The individual sampled at Charlie  
400 Lake and the individual sampled at Castlegar were used for whole-genome sequencing, and the  
401 remainder of the samples were used for whole-genome resequencing (see *Data Availability*). The

402 Charlie Lake assembly was not used in this study, but the sample's data was used in the rest of the  
403 analyses as a representative for this collection site.

404 In total, 1,363,731 raw SNP variants were called in the whole-genome resequencing data, and  
405 after all quality filtering, 1,127,943 SNPs were retained (i.e., 82.7% retention; see Table 2). On  
406 average, the mean ( $\pm$  s.d.) depth per individual per variant site was  $20 \pm 3.3x$  (range = 15x to 30x).  
407 There was a large difference in genetic variation observed across sampling sites (Figure 1B; Table 3).  
408 Interior Alaska samples (CHT) had the highest rate of heterozygous genotypes (mean per individual =  
409 180,943 SNPs), followed by the Yukon River (HOO; 126,720 SNPs). All other populations had fewer  
410 heterozygous SNPs, with 58,129 heterozygous SNPs in northwestern BC (PAL), 49,401 in Manitoba  
411 (WHI), 64,394 in New York (SLA), and 67,944 in New Jersey (HCK). Additionally, Alaska, Yukon,  
412 and northwestern BC had similarly high numbers of homozygous alternate genotypes (mean per  
413 individual: 116,276, 84,775, and 101,465, respectively), and the eastern BC and eastern Canada/US  
414 samples had similarly lower numbers of homozygous alternate genotypes ranging from 18,525 to  
415 31,385 on average per individual (Additional File S1). Considering the ungapped genome length of  
416 940.8 Mbp, and including both heterozygous and homozygous alternate variants, the CHT and SLA  
417 populations have an average per individual difference from the reference genome of 0.0316% and  
418 0.00891%, respectively. In terms of the average SNP per kbp per individual, CHT and SLA have a  
419 SNP for every 3,165 bp and 11,222 bp, respectively. The average observed heterozygosity ( $H_{OBS}$ ) per  
420 population followed a similar trend as heterozygous SNP counts, with  $H_{OBS}$  of CHT and HOO  
421 estimated at 0.161 and 0.113, respectively, whereas PAL, WHI, SLA, and HCK ranged from 0.044-  
422 0.060. More pronounced negative Tajima's D values were observed in WHI and SLA, with values of  
423 -1.07 and -1.30, respectively, than HCK (-0.33) or the higher diversity populations CHT and HOO (-  
424 0.22 and -0.331, respectively; Table 3). Results for the populations with only a single individual should  
425 be taken with caution given the low sample size, different technology applied to sequencing, and for  
426 the Castlegar sample (CAS), being the reference genome used in the study.

427 Genetic similarity between individuals and populations based on clustering in a genetic  
428 dendrogram followed a similar trend to that observed in overall variation (i.e., considering the sum of  
429 both heterozygous and homozygous alternate genotypes), where the Alaska (CHT), Yukon (HOO),  
430 and northwestern BC (PAL) populations clustered separately from all other samples (Figure 2). Most  
431 of the populations had very strong support (100%) for grouping all individuals in the population  
432 together, and only the Yukon (HOO) population did not show a highly supported single cluster. Within



433 each separate section of the dendrogram for high or low diversity samples, the closest populations  
434 geographically were also the most proximal in the dendrogram.

435 An analysis of private alleles and fixed differences further indicates the genetic separation and  
436 isolation of the different populations. Of the 1.1 M variants characterized, 0.75 M were only present in  
437 a single population (i.e., private alleles), and although many are of low frequency, each population  
438 with at least four individuals had between 21,290-214,742 private alleles present. As an example, CHT  
439 has 81,263 private alleles with at least four instances of the allele being observed, whereas HOO has  
440 5,395, HCK has 26,173 and SLA has 5,989 private alleles with at least four instances of the allele.  
441 Furthermore, when considering fixed homozygous alternate genotypes, a large proportion of these  
442 were unique to each population. For example, there were 34,561 biallelic variants that were observed  
443 as only homozygous alternate genotypes in Alaska (CHT), and of these, 34,002 were fixed reference  
444 in St. Lawrence River (SLA) and 33,285 were fixed reference in the Yukon (HOO). As another  
445 example, there were 13,777 biallelic variants observed as only homozygous alternate genotypes in  
446 SLA, and of these, 10,975 and 9,993 were observed as fixed homozygous reference in the  
447 Hackettstown (HCK) or Alaska (CHT) populations, respectively. Therefore, many variants identified  
448 here were specific to one of the populations, and many variants were fixed in specific populations,  
449 even in geographically proximal populations.

450 The distribution of variants was not equal across the northern pike genome (Figure 3A). When  
451 considering the sum of variants within 1 Mbp windows across chromosomes ( $n = 930$  windows total),  
452 59 windows were considered outliers in terms of elevated polymorphism (see *Methods*) with more than  
453 2,341 variants per window in comparison with the genome-wide average of 906 variants per window  
454 (median: 1,202; Additional File S2). Several of the chromosomes have large sections of elevated  
455 variation where multiple consecutive windows are outliers, specifically chromosomes 5 (3' end, 24-29  
456 Mbp), 9 (5' end, 4-10 Mbp), 11 (3' end, 35-44 Mbp, excluding 41-42 Mbp), and 24 (throughout, 0-5  
457 Mbp excluding 3-4 Mbp, and 18-23 Mbp; Figure 3A). Furthermore, when considering a per-  
458 chromosome average number of variants per kbp, chromosome 24 has a clear elevation overall in terms  
459 of polymorphism level relative to all other chromosomes (Figure 3B). Notably, in populations that still  
460 use *amhby* as the sex determining gene, this gene is in chromosome 24. Some preliminary exploration  
461 of elevated polymorphic regions suggests presence of genes related to immunity or having multiple  
462 copy numbers, for example chromosome 09 contains zinc-finger genes, immune-associated nucleotide-  
463 binding protein genes (GIMAPs), as well as multiple genes of the major histocompatibility complex  
464 (MHC) class II type, but it is beyond the scope of this paper to describe all of the regions of the northern  
465 pike genome with elevated SNP density.

466

## 467 **Sex determination**

468 The dataset was restricted to only include individuals with phenotypic sex recorded, and following  
469 filters, there were 672,565 SNPs retained across 17 females and 21 males. All individuals were initially  
470 analyzed together (i.e., on a continental scale) using three different approaches to search for a sex-  
471 specific locus in the data. Both a genome-wide association study (GWAS) and a DAPC with sex as the  
472 separating variable were performed but found no significant or suggestive associations (*data not*  
473 *shown*). Additionally, a k-mer analysis of raw sequence reads and therefore operating independently  
474 of a reference genome also failed to identify sex-specific polymorphism at this scale. The reference-  
475 independent approach was valuable given that the reference genome used to score SNPs was developed  
476 from a female individual, and therefore the male-specific sex determining locus would be expected to  
477 be missing (Pan et al., 2021).

478 After the continental-scale analyses failed to find sex-associated loci, population-specific  
479 analyses were conducted. With this focused analysis, a sex-specific signal was detected in the Alaskan  
480 sample (CHT; n = 5 individuals per sex), where male-specific heterozygosity was observed on LG24  
481 through both the DAPC and k-mer analyses (Figure 4), as previously observed (Pan et al., 2019). In  
482 the CHT samples, a 500 kb region between 650-1150 kb of LG24 (total chromosome length: 29.5 Mbp)  
483 was detected, containing 3,552 male-specific SNPs. In addition, 1,137 male-specific and 39 female-  
484 specific SNPs from other sections of the genome were also identified by DAPC analysis (Additional  
485 File S3). Although none of the Yukon River (HOO) samples had associated phenotypic sex  
486 information, one of the five individuals also held the male-specific SNPs on LG24 (and elsewhere)  
487 identified from the Alaska population on LG24. However, all other populations assessed in North  
488 America did not hold these sex-specific variants (Figure 4).

489 To further characterize the genetic sex of the sampled individuals across North America, since  
490 the reference genome is generated from a female and therefore is not expected to have the male-specific  
491 sex-determining locus *amhby*, the presence of *amhby* was investigated using *amhby*-specific primers  
492 in a PCR analysis (Pan et al., 2021). This confirmed that *amhby* was present in the phenotypic males  
493 from Alaska (CHA) and the putative male from the Yukon (HOO) as observed in the sequence data.  
494 None of the other samples in any collection used for WG-resequencing in North America amplified  
495 *amhby*. The PCR results therefore agree with the lack of a sex-specific signal in the other populations  
496 by GWAS, DAPC, or k-mer analyses (*see above*).

497 Additional sampling was undertaken to further characterize the geographic regions in which  
498 the transition from *amhby*(+)-males to *amhby*(-)-males occurs. Two additional females and three males  
499 were obtained from the Columbia River at Castlegar, BC (CAS), and six females and 14 males were  
500 obtained from Minto Flats, Alaska. These samples were tested for *amhby* by PCR markers (Pan et al.,  
501 2021), as above. Interestingly, all three of the Castlegar males were positive for *amhby* (females were  
502 negative); this contradicts the expectation of the absence of *amhby* in males in this region. Also  
503 unexpectedly, the Minto Flats males, expected to all be *amhby*(+), did not show a uniform positive  
504 detection with only six of the 14 phenotypic males with a positive *amhby* detection (the females were  
505 all negative). All three primer pairs, including *amhby\_conserve* (partial exon 2) and *seqAMH\_1* (partial  
506 exon 7) from Pan et al. (2021), and primer pair set\_24.5 (LG24: 996,878-997,339 bp) found concordant  
507 results for these samples. Sex phenotypes were further evaluated through gonadal histology, which  
508 confirmed testes development in both *amhby*(+) and *amhby*(-) males (Figure 5). Therefore, there are both  
509 *amhby*(+) and *amhby*(-) males in Alaska, and *amhby*(+) males further southeast than expected in North  
510 America.

511

## 512 **Discussion**

### 513 **Genetic diversity across North America**

514 In all the populations assessed across North America from Alaska through New Jersey, the northern  
515 pike from the west in Interior Alaska and the Yukon River have the highest genomic diversity. A  
516 striking decrease in overall diversity coincides with the location of the North American Continental  
517 Divide (NACD; i.e., the separating point between eastward or westward-flowing watersheds). West of  
518 the NACD, a stepwise decrease in diversity occurs from Interior Alaska to the Yukon, then to  
519 northwestern British Columbia, as measured by observed heterozygosity and the total number of  
520 heterozygous variants. East of the NACD, the populations have uniformly low diversity. The eastern  
521 region samples at the Manitoba hatchery (Whiteshell) and the St. Lawrence River had more  
522 pronounced negative Tajima's D values, suggesting that these populations were reduced in number  
523 and then more recently expanded, resulting in an excess of low frequency polymorphism (Hedrick,  
524 2005; Tajima, 1989). This was not universally observed in the eastern samples (e.g., Hackettstown had  
525 a similar Tajima's D value as western sites). The NACD may not be causal to the diversity decrease,  
526 although it is an important land formation that influences contemporary water catchments and flow,  
527 but it does serve as a marker beyond which all populations surveyed to date have been found to have  
528 universally low diversity. The west to east diversity decrease is in agreement with theory that the

529 western populations are the oldest in North America, and that while these populations expanded  
530 eastward from the Beringia refugium, for example while recolonizing post-glacial recession, they were  
531 impacted by population bottlenecks, founder effects, and possibly other diversity-reducing impacts  
532 (Crossman & Harington, 1970; Skog et al., 2014).

533 Even in the most diverse population in the dataset (i.e., Interior Alaska; CHT), genome-wide  
534 genetic diversity is very low; per individual, a SNP is observed on average every 3.2 kb. In the eastern  
535 populations (e.g., St. Lawrence River; SLA), this number reduces to a SNP on average every 11.2 kb.  
536 This is remarkably low when compared to marine fishes including Atlantic herring *Clupea harengus*  
537 (1 variant per 0.3 kb; Martinez Barrio et al., 2016) and Atlantic cod *Gadus morhua* (1 variant per 0.5  
538 kb; Star et al., 2011), as well as freshwater fishes such as rainbow trout *Oncorhynchus mykiss* (1 variant  
539 per 0.75 kb; Gao et al., 2018). Furthermore, northern pike were estimated to be on average 0.0089% -  
540 0.032% different from the reference genome. For comparison, humans *Homo sapiens*, known to  
541 contain low levels of genetic variation, are four to 13-times more genetically diverse than the northern  
542 pike as assessed here (i.e., 0.11% - 0.13% difference from the reference; Auton et al., 2015). However,  
543 this low level of genetic diversity does not preclude evolutionary successful strategies; northern pike  
544 are renowned for their ability to thrive in a variety of environments and to expand into and colonize  
545 new areas (Luan et al., 2021).

546 In the region that separates high and low diversity North American northern pike, local effects  
547 may be further impacting diversity levels. The BC population Palmer Lake (PAL) is from a lake off  
548 the large Atlin Lake, which eventually flows into the Yukon River. The Palmer Lake population has  
549 lower genetic variation than the Yukon River population (HOO), even though these two sites are  
550 relatively proximal and may have at one time been directly connected. However, the Palmer Lake  
551 population may have lost variation due to inbreeding and drift. The apparent very low diversity of the  
552 Columbia River sample (CAS), and the lower diversity of Charlie Lake sample (CHA) relative to the  
553 Palmer Lake population may be due to technical artefacts, since both samples only had a single sample  
554 characterized from the population and underwent different sequencing technology to characterize their  
555 variation. Furthermore, the CAS individual was the source of the reference genome assembly, which  
556 would further reduce the characterized variation given that there would be no homozygous alternate  
557 genotypes observed. However, the Columbia River population (CAS) is in fact invasive from east of  
558 the NACD (Carim et al., 2019), and therefore it may have low diversity relative to BC populations  
559 west of the NACD. Additional samples would be needed from these two populations to accurately  
560 place them in the context of other populations genotyped here. Furthermore, introductions of northern  
561 pike have occurred in BC waters (Harvey, 2009), which could impact spatial trends in unexpected

562 ways depending on the source population and size of the introduction. In conclusion, local impacts  
563 such as isolated populations or translocation history may explain differences from the expected level  
564 of diversity based on the broader regional location and proposed expansion history. The boundary  
565 region between elevated diversity and low diversity east of the NACD provides an interesting area of  
566 contrast that requires further characterization.

567         Although northern pike from east of the NACD had low genetic variation, in the present  
568 analysis each population was still consistently clustering with members of its own population with  
569 strong bootstrap support. Therefore, although previous studies have been unable to distinguish different  
570 populations of northern pike in eastern North America (Miller & Senanan, 2003; Senanan &  
571 Kapuscinski, 2000; Skog et al., 2014), in agreement with Ouellet-Cauchon et al. (2014) our results  
572 suggest separability of populations in the low diversity collections. The high degree of private alleles  
573 per population observed here is notable and may be explained by northern pike experiencing high  
574 genetic drift and expansion from a few individuals. These high levels however should be further  
575 investigated once more samples are included per population. Similar to distinct groupings observed  
576 here, although low nucleotide diversity was observed in eastern Russia, high genetic differentiation  
577 was observed in populations sharing a common origin, likely due to founder effects (Bachevskaja et  
578 al., 2019). Less differentiation may occur in central Europe. For example, in Germany, erosion of  
579 population substructure occurs alongside habitat degradation, which may be due to eutrophication and  
580 habitat loss leading to natural dispersal (Eschbach et al., 2021). The loss of differentiation also occurs  
581 by secondary contact of separate populations through human-mediated stocking, and diversity erosion  
582 was observed to be most severe in rivers or in modified water bodies (Eschbach et al., 2021). Given  
583 the well-supported clustering observed here across different populations in North America, population  
584 management may be feasible as reported for the congener *Esox masquinongy* (Rougemont et al., 2019).  
585 As an example, genetic markers have been used to determine the likely source of an introduced invasive  
586 population of northern pike in eastern Washington State, finding that it was likely a human-mediated  
587 transfer from disconnected populations in Idaho (Carim et al., 2022). To determine the ability to  
588 perform stock identification in the populations identified here would require further analysis with  
589 larger sample sizes to determine the expected power of genetic assignment tests (e.g., Moran &  
590 Anderson, 2019).

591

## 592 **Genetic diversity across the genome**

593 Genetic diversity is not universally low across the northern pike genome, as certain regions are  
594 enriched for polymorphism (e.g., regions of chromosomes 5, 9, 11, and 24). These chromosomes have  
595 large regions of elevated diversity, which may indicate the presence of specific genes or high variability  
596 regions. Although a full inspection of the regions has not been conducted, some regions hold immune-  
597 related genes (e.g., major histocompatibility complex (MHC) region in chromosome 9). The MHC is  
598 known to be highly variable in vertebrates, and its variability is valuable for presentation of a diverse  
599 range of antigens for pathogen recognition (Piertney & Oliver, 2006; Unanue et al., 2016). Regions of  
600 elevated diversity in the genomes of otherwise low diversity species have been identified previously.  
601 For example, channel island foxes (*Urocyon littoralis*) have highest SNP density in olfactory receptor  
602 genes (Robinson et al., 2018). Humans, also known for low genetic diversity, have an enrichment of  
603 polymorphism around genes related to sensory perception and neurophysiology (Redon et al., 2006).  
604 Enrichment of polymorphism in certain areas is also observed in species with generally higher overall  
605 diversity; stickleback are known to have an enrichment of polymorphism around genes controlling  
606 bony plate number and morphology (Nelson et al., 2019). Collectively, these observations suggest that  
607 regions of high variation in the genome are associated with phenotypic variation that may be  
608 instrumental to the survival of the species. The maintenance of genetic variation may therefore be most  
609 crucial in genetic regions that affect the ability of a species to detect or respond to stimuli that are both  
610 fundamental to survival and that fluctuate in their habitat. The enriched polymorphic regions identified  
611 here in northern pike merit further investigation.

612 The observation of chromosome 24 having multiple separate regions of elevated diversity is in  
613 contrast with single regions as observed in chromosomes 5, 9, and 11. Importantly, in the populations  
614 that retain *amhby* in males, chromosome 24 contains the master sex determining gene (Pan et al., 2019).  
615 Differentiation of sex chromosomes in northern pike has previously been determined to be generally  
616 low (Pan et al., 2019). Lower levels of recombination between the X and Y chromosomes can occur,  
617 which may result in degeneration of Y due to the accumulation of mutations (Charlesworth, 1991).  
618 This can provide a benefit by sequestering sexually antagonistic alleles on sex chromosomes with  
619 reduced recombination (Charlesworth & Charlesworth, 2005; Mackay, 2001), but this is not expected  
620 in northern pike (Pan et al., 2019). In salmonids, for example, heterochiasmy occurs whereby a lack of  
621 recombination in males occurs throughout the genome, with crossovers primarily occurring at  
622 telomeric regions opposite to the centromere (Moen et al., 2004; Sakamoto et al., 2000; Sutherland et  
623 al., 2017). Heterochiasmy also occurs in humans (Broman et al., 1998). However, any heterochiasmy



624 observed in northern pike appears to be low, as observed by Rondeau et al. (2014) that only a slight  
625 skew in recombination rates occurs between the sexes. The presence of multiple regions and generally  
626 elevated overall polymorphism enrichment in chromosome 24 merits further investigation, especially  
627 within populations that have lost the sex determining gene from this chromosome. With more  
628 populations and individuals characterized in the future, the precision of the location of these genomic  
629 regions or interpopulation variation that may exist will be valuable to be explored further.

630

### 631 **Sex determination and a patchwork of *amhby* presence in western North America**

632 Range expansion, if impacted by founder effects or population bottlenecks, may not only result in a  
633 loss of neutral genetic variation but also in a loss of functional genetic variation. The master sex  
634 determining gene *amhby* is considered to have been lost during expansion into North America (Pan et  
635 al., 2021), which coincides with a loss of overall genetic diversity (Skog et al., 2014), and our results  
636 are concordant with this finding. Northern pike can undergo sex reversal, possibly influenced by  
637 environmental signals (Pan et al., 2019) as has been observed in other teleosts (Rajendiran et al., 2021),  
638 as well as through disruptions of other genes in the pathway including *amh receptor II* (Pan et al.,  
639 2023). Therefore, as described by Pan et al. (2021), the founding of a population comprised of *amhby*(-  
640 ) individuals (i.e., no genetic males) followed by sex reversal could presumably result in the  
641 establishment of populations without the master sex determining gene.

642 In the present study, *amhby*(-) populations are largely what was observed in populations  
643 southeast to the Yukon Territory. However, this observation was not universal, as there were also  
644 detections of Alaskan *amhby*(-) males and Columbia River *amhby*(+) males. North American northern  
645 pike provides a valuable model to study sex determination evolution; as Pan et al. (2021) describe that  
646 the old genetic sex determining system is lost before a new system has taken its place, and  
647 environmental sex determination may play a transition state for these populations. The observations  
648 here point to a mosaic of *amhby* presence and presumed activity in males in the boundary region from  
649 Alaska through British Columbia. East of British Columbia, however, there were no observations of  
650 *amhby*(+) males. It is unclear how the Castlegar males retained *amhby*, as they may have retained the  
651 gene from the source population in Alaska, or they may be descendants of another lineage that still  
652 uses the *amhby* system. Further characterization of populations in this area may further elucidate the  
653 interaction between an environmentally mediated sex determination system and the potential for  
654 emergence of a new genetic system for sex determination (Pan et al., 2021).

655           The lack of the *amhby* gene in eastern populations does not coincide with a lack of males in  
656 eastern Canada. However, it is notable that upper St. Lawrence River populations have experienced  
657 sex ratio shifts from male to female dominance in recent decades (Farrell & Barry, 2012). An earlier  
658 attempt by Rondeau and co-workers (*unpublished*) to map the sex determining locus using five  
659 biparental crosses of St. Lawrence region northern pike where phenotypic sex was determined by  
660 histology resulted in three highly male-biased families (from 76-92% male) and two moderately male-  
661 biased families (from 56-65% male), and the inability to detect sex-linked markers was thought to be  
662 due to the strong sex bias combined with low polymorphism (Rondeau, *unpublished*). However, more  
663 recent analyses, as discussed above, suggest that this was due to the lack of a genetic sex determination  
664 system at play currently in these eastern populations. Additional analysis of these samples using the  
665 markers developed by Pan et al. (2021) also failed to detect *amhby*, and so the resequencing approach  
666 here was taken as reported in the present study.

667

## 668 **Genome assembly**

669 A new individual was used for the latest version of the assembly due to decreasing quantity and quality  
670 of any remaining material used for earlier versions. Regardless, with the significant advances that  
671 occurred in sequencing and assembly, the latest assembly was superior in metrics and utility relative  
672 to earlier assemblies. In human medical, agricultural, or even now conservation and population  
673 genomic fields, there are an increasing number of assemblies for the same species, with researchers  
674 generating references specific to their population; this can have benefits in terms of alignment success  
675 and variant calling (Thorburn et al., 2023), but also needs to be considered in terms of detecting  
676 potential reference bias, in particular when populations are highly divergent (Bohling, 2020). In  
677 northern pike, there now exists both the North American female assembly from the Castlegar  
678 population of the Columbia River (presented here), as well as a high quality European male assembly  
679 (Pan et al., 2019) that was optimal for characterizing the sex determination region within the genome.  
680 Future additions of other assemblies from Asian or other lineages may eventually produce a pan-  
681 genome for the species that represents the diversity of this Holarctic species.

## 682 **Conclusions**

683 In the present work we generate a long-read assembly with chromosome-length scaffolds, and use this  
684 resource to characterize population genetic trends at a genome-wide scale, as well as genomic diversity  
685 trends within and between chromosomes. By combining sex-specific analyses of whole-genome  
686 resequencing data with PCR-based assays for sex markers, we were able to identify a patchwork of  
687 populations with or without the male-based sex determination system *amhby*. This patchwork, so far  
688 including *amhby*(+) and *amhby*(-) males in Alaska and *amhby*(+) males in the Columbia River, points  
689 to a more complex landscape of the loss of this sex determining system that occurred from west to east  
690 in North America. The large number of private alleles and clear clustering of individuals within each  
691 population points to substantial drift in individual populations. Population distinctiveness would be  
692 expected to enable genetic stock identification of different populations, although this remains largely  
693 untested. The clear trends of decreased diversity (and loss of functional genetic sex determination gene)  
694 with distance from Alaska is in agreement with the theory that northern pike expanded outward from  
695 Alaska after the deglaciation of the last ice age, and that significant founder effects impacted  
696 populations in the recolonized range. Regional effects in population diversity were observed as well,  
697 and from evidence so far, the North American Continental Divide provides a marking point after which  
698 diversity is uniformly low. Additional samples from more southern regions including the Columbia  
699 River would be beneficial to understand these post-glacial trends.

700

## 701 **Acknowledgements**

702 We are grateful to the following people and organizations for providing samples for this study: Charles  
703 O. Hayford State Fish Hatchery (Hackettstown, NJ, USA); the Alaska Department of Fish and Game;  
704 the Manitoba Fisheries Branch; Whiteshell fish Hatchery (West Hawk Lake, Manitoba); Jeremy Baxter  
705 of Mountain Water Research; and Marco Marrello of Terraquatic Resource Management. We thank  
706 Dr. Miya Qiaowei Pan and Dr. Yann Guiguen for collaboration and insights supporting the genetic sex  
707 analyses in this study. Thanks to Dr. Sergio Cortez Ghio of Ex Machina Biostats for discussions on  
708 identifying regions of polymorphism enrichment. This work was supported by NSERC (RGPIN/3888-  
709 2017) and the New York Environmental Protection Fund AM-10165 administered by the NYS  
710 Department of Environmental Conservation.

711

## 712 **Competing Interests**

713 Ben Sutherland is affiliated with Sutherland Bioinformatics. The author has no competing financial  
714 interests to declare. The other authors declare that no competing interests exist.

715

## 716 **Data Availability**

717 The reference genome v.4.0 is available through NCBI WGS accession SAXP01000000.1 and  
718 assembly accession GCA\_004634155.1. Whole genome resequencing data is available through  
719 BioProject accession PRJNA512507 and SRA accessions SAMN10685075 – SAMN10685119.

720

721 The filtered VCF file with dataset SNPs from alignment to reference genome v4.0 is available on  
722 FigShare: <https://doi.org/10.6084/m9.figshare.25230146>

723

724 This work was supported by the following GitHub repositories:

725 General data analysis: [https://github.com/bensutherland/ms\\_pike\\_popgen](https://github.com/bensutherland/ms_pike_popgen)

726 Genome data analysis scripts: <https://github.com/enormandeu/Scripts>

727

## 728 **Author Contributions**

729 Designed Research: Ben F Koop, Eric B Rondeau

730 Performed Research: Eric B Rondeau, Hollie A Johnson, Ben J G Sutherland, Joanne Whitehead,

731 Cody A Despins, Brent E Gowen, Christopher M Whipps, John M Farrell, Brian J Collyard

732 Analyzed Data: Hollie A Johnson, Eric B Rondeau, Ben J G Sutherland, David R Minkley, Jong S

733 Leong, Joanne Whitehead

734 Wrote the Paper: Hollie A Johnson, Eric B Rondeau, Ben J G Sutherland

735 **Figures**

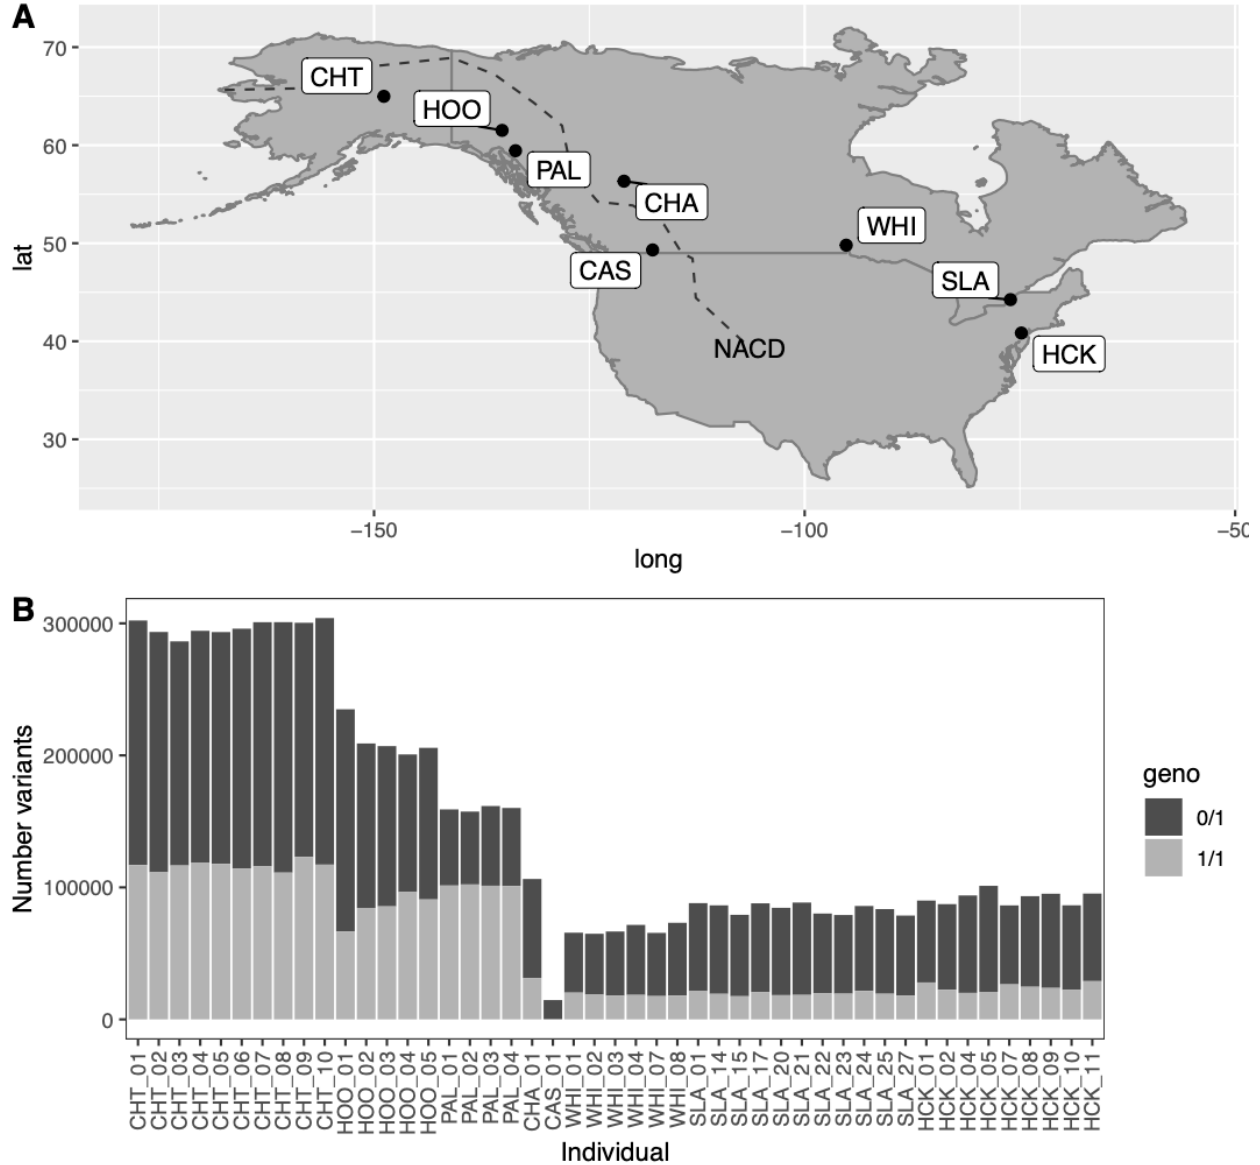

736  
737

738 **Figure 1.** (A) Sampling locations for northern pike across North America, including Chatanika River,  
739 Alaska (CHT), Yukon River at Hootalinqua, Yukon Territory (HOO), Palmer Lake, British Columbia  
740 (B.C.; PAL), Charlie Lake, B.C. (CHA), Columbia River at Castlegar, B.C. (CAS), Whiteshell  
741 Hatchery, Manitoba (WHI), St. Lawrence River at New York (SLA), Hackettstown Hatchery, New  
742 Jersey (HCK). (B) Per individual total counts of homozygous alternate (light shading) or heterozygous  
743 (dark shading) variants.

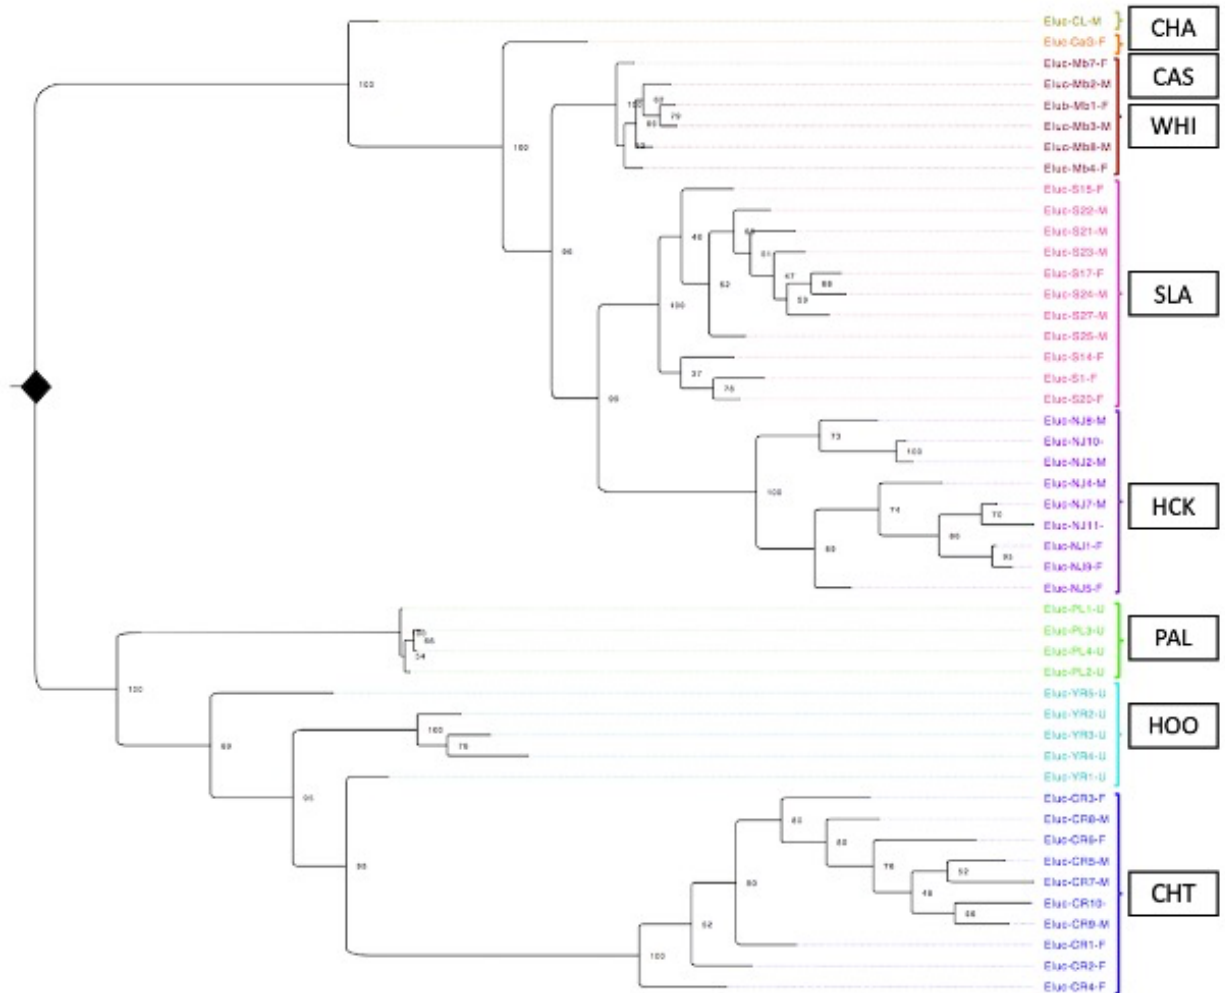

744

745 **Figure 2.** Genetic dendrogram clustering of individual northern pike using all filtered SNP variants.  
746 Bootstrap support is indicated at branch nodes as evaluated by 1,000 bootstraps. The largest separation  
747 in the data separates samples across the North American Continental Divide (NACD), with populations  
748 from Alaska (CHT), Yukon (HOO), and northwestern British Columbia (PAL) separating from all  
749 other populations. See Table 1 for all acronyms.

750



751

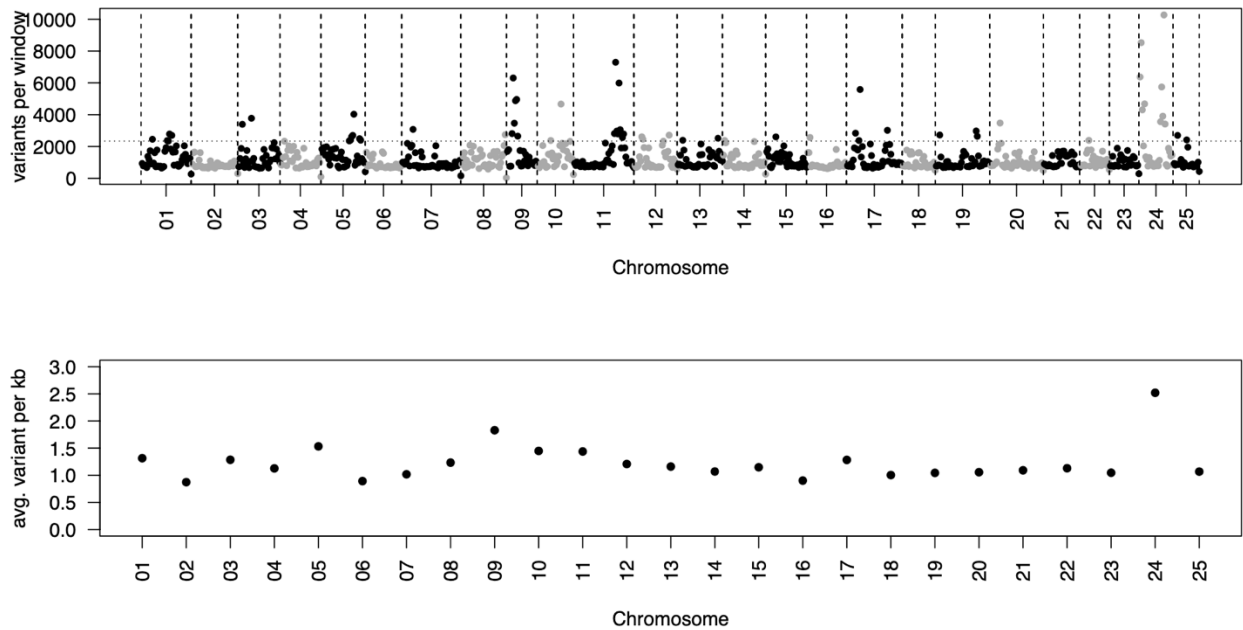

752

753 **Figure 3.** (A) Genome-wide SNP density by chromosome showing all SNP variants retained in the  
754 dataset, with variants summed across 1 Mbp windows ( $n = 930$  windows total). Windows above the  
755 outlier threshold are indicated by the horizontal hatched line (*see Methods*). (B) The per chromosome  
756 average number of variants per kbp are shown, indicating chromosome 24 as a clear outlier overall.  
757

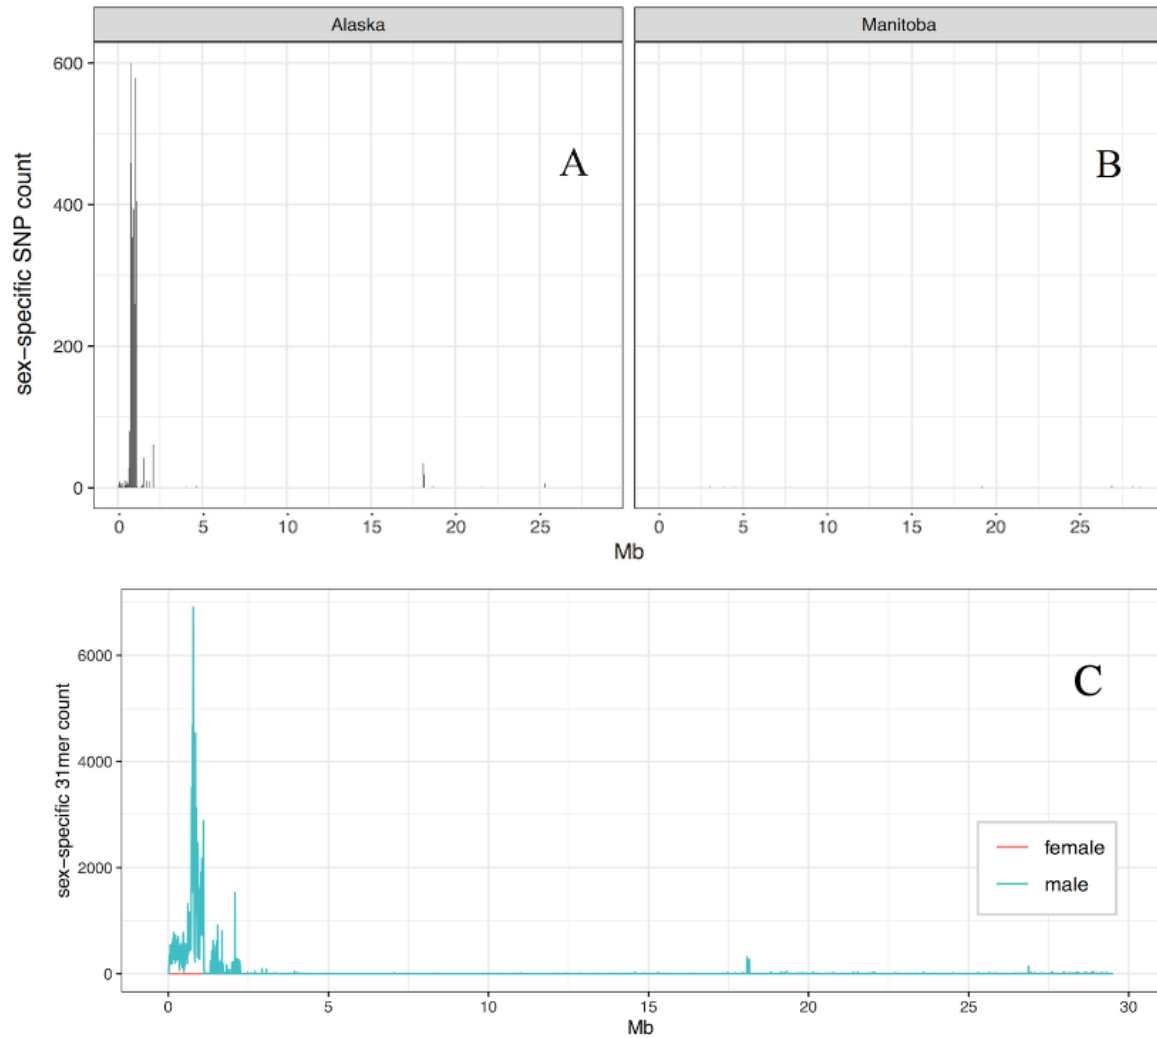

758  
759  
760  
761  
762  
763  
764

**Figure 4.** Sex-specific SNP counts for LG24 shows a strong signal in the Alaska population (panel A; CHT), and a lack of signal for populations east of the NACD (panel B; WHI used as example). The sex-specific signal is also observable in the Alaskan LG24 when viewing k-mer content rather than variant content. The k-mers were identified independent to the reference genome, but were aligned to the genome after identification.

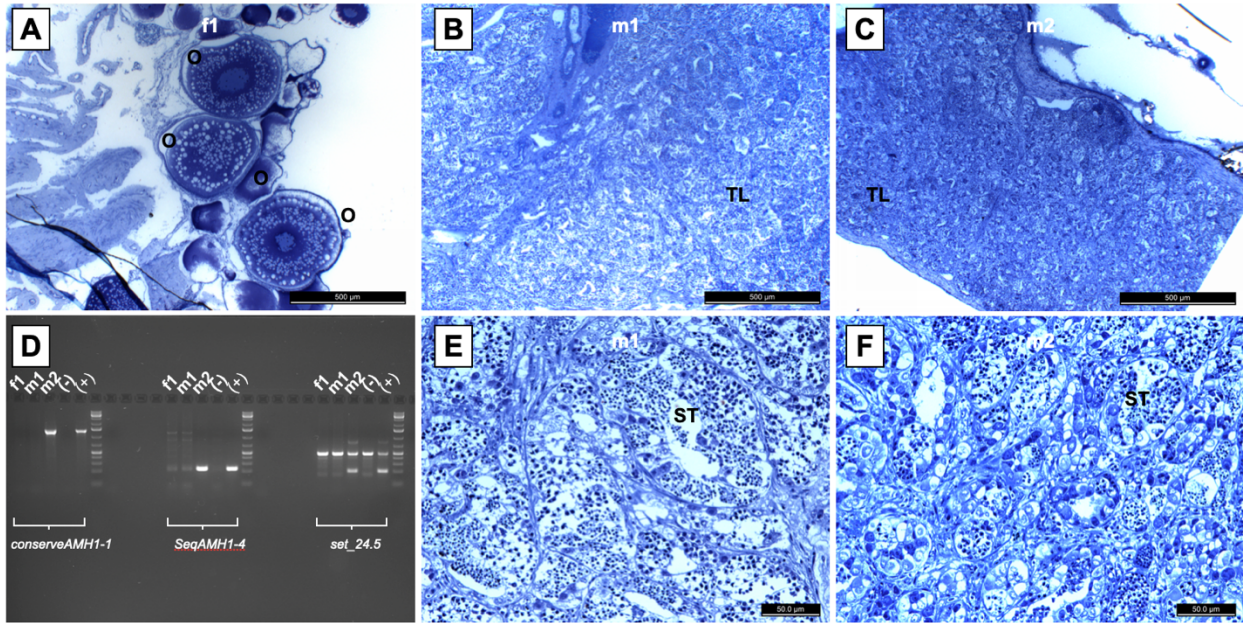

765

766 **Figure 5.** Gonadal histology and *amhby* PCR testing for sex genotypes and phenotypes in additional  
767 samples from Minto Flats, Alaska. The phenotypic female (f1) is shown in panel (A) with oocytes (O)  
768 indicated at various stages of vitellogenesis. The two phenotypic males m1 and m2 are shown in panels  
769 (B) and (E), and panels (C) and (F), respectively, with testis lobules (TL) and seminiferous tubules  
770 (ST) indicates with gametes at various stages of spermatogenesis. In panel (D), PCR results of  
771 amplicons developed with the three primer pairs applied (see *Methods*) for the female (f1), an *amhby*(-)  
772 male (m1), and an *amhby*(+) male (m2), as well as a negative and positive control sample for each  
773 primer pair, selected from samples from Alaska (CHT) in the resequencing data. Primer sets  
774 *conserveAMH1-1* and *SeqAMH1-4* by Pan et al. (2021) indicate *amhby* by a single band, and *set\_24.5*  
775 indicates presence of *amhby* by a second band.

776 **Tables**

777 **Table 1.** Sampling location details and sample sizes classified using phenotypic sex information.  
 778 Sample sites with unrecorded phenotypic sex are indicated as unknown (*unkn.*). The most recent  
 779 genome assembly (v.4.0) was constructed using the Castlegar female. Samples were obtained  
 780 throughout North America including from Alaska (AK), the Yukon Territories (YT), British Columbia  
 781 (BC), Manitoba (MB), New York (NY), and New Jersey (NJ). Populations obtained from hatcheries  
 782 are indicated with an asterisk. The short names for each sample site are provided.  
 783

| Country      | Prov/<br>State | Population   | Short<br>name | Latitude | Longitude  | Mal.<br>(n)  | Fem.<br>(n)  | Tot.<br>(n) |
|--------------|----------------|--------------|---------------|----------|------------|--------------|--------------|-------------|
| USA          | AK             | Chatanika R. | CHT           | 64.98396 | -148.86032 | 5            | 5            | 10          |
| Canada       | YT             | Hootalinqua  | HOO           | 61.51156 | -135.13209 | <i>unkn.</i> | <i>unkn.</i> | 5           |
| Canada       | BC             | Palmer Lk.   | PAL           | 59.43708 | -133.57592 | <i>unkn.</i> | <i>unkn.</i> | 4           |
| Canada       | BC             | Charlie Lk.  | CHA           | 56.32853 | -120.97835 | 1            | -            | 1           |
| Canada       | BC             | Castlegar    | CAS           | 49.31538 | -117.65344 | -            | 1            | 1           |
| Canada       | MB             | Whiteshell   | WHI*          | 49.80051 | -95.17243  | 3            | 3            | 6           |
| USA          | NY             | St. Lawrence | SLA           | 44.24787 | -76.09785  | 6            | 5            | 11          |
| USA          | NJ             | Hackettstown | HCK*          | 40.84155 | -74.83359  | 6            | 3            | 9           |
| <b>Total</b> |                |              |               |          |            | 21           | 17           | 47          |

784

785

786 **Table 2.** Variant filtering steps and parameters applied after alignments of reads against the northern  
 787 pike reference genome (v.4.0).  
 788

| Filter Step                         | Parameter<br>value | Program     | No. variants<br>retained |
|-------------------------------------|--------------------|-------------|--------------------------|
| Raw genotypes<br>(includes indels)  | -                  | -           | 1,910,789                |
| SNP variants only                   | -                  | GATK        | 1,363,731                |
| GATK hard filter                    | -                  | GATK        | 1,189,068                |
| Min. quality                        | 20                 | VCFtools    | 1,186,793                |
| Min. mean depth                     | 10                 | VCFtools    | 1,153,668                |
| Max. mean depth                     | 60                 | VCFtools    | 1,152,122                |
| Max. missing count                  | 10                 | VCFtools    | 1,129,884                |
| Minor allele count                  | 1                  | VCFtools    | 1,129,701                |
| Per locus heterozygous<br>genotypes | < 100%             | R/ VCFtools | <b>1,127,943</b>         |

789

790

791 **Table 3.** Per population summary statistics following genotyping, including the average number of  
792 heterozygous or alternate homozygous variants per individual, the per population observed  
793 heterozygosity, Tajima's D, and the number of private alleles. Sample size was rounded to nearest  
794 whole number. Acronyms: CHT = Chatanika R.; HOO = Hootalinqua; PAL = Palmer Lake; CHA =  
795 Charlie Lake; CAS = Castlegar; WHI = Whiteshell; SLA = St. Lawrence River; HCK = Hackettstown.  
796

| Pop | (n) | Average no.<br>variants<br>per indiv.<br>(ref/alt) | Average no.<br>variants<br>per indiv.<br>(alt/alt) | Obs.<br>heterozyg.<br>( $H_{OBS}$ ) | Tajima's<br>D | Private<br>alleles |
|-----|-----|----------------------------------------------------|----------------------------------------------------|-------------------------------------|---------------|--------------------|
| CHT | 10  | 180,943.2                                          | 116,275.7                                          | 0.1609                              | -0.221        | 204,410            |
| HOO | 5   | 126,719.8                                          | 84,774.6                                           | 0.1127                              | -0.331        | 67,803             |
| PAL | 4   | 58,128.5                                           | 101,464.5                                          | 0.0516                              | -0.072        | 21,290             |
| CHA | 1   | 74,996.0                                           | 31,385.0                                           | 0.0668                              | -             | 14,736             |
| CAS | 1   | 14,552.0                                           | 96.0                                               | 0.0129                              | -             | 17,974             |
| WHI | 6   | 49,401.8                                           | 18,524.8                                           | 0.0438                              | -1.068        | 101,149            |
| SLA | 11  | 64,393.5                                           | 19,442.5                                           | 0.0571                              | -1.300        | 214,742            |
| HCK | 9   | 67,943.5                                           | 24,188.0                                           | 0.0604                              | -0.328        | 107,085            |

797

798 **Additional Files**

799 **Figure S1.** Hi-C contact map as visualized in Juicebox v 1.8.8 for assembly v4.0 GCF\_004634155.1.

800

801 **Figure S2.** Distribution of repeats along the assembly v4.0 GCF\_004634155.1, displayed in bins of  
802 100,000 bp along the chromosome, with counts of masked bases per bin.

803

804 **Table S1.** Primer names, sequences, and annealing temperatures for sex markers. SeqAMH1 and  
805 ConserveAMH1 are reported in Pan et al. (2021).

806

807 **Table S2.** RepeatMasker summary table for assembly version 4.0 (GCF\_004634155.1). Description  
808 of custom repeat library generation and masking methods described in Rondeau et al, (2014).

809

810 **Additional File S1.** Counts and locus identifiers of heterozygous or homozygous alternate variants per  
811 individual for all individuals in the study.

812

813 **Additional File S2.** Sum of variants per window across the genome in 1 Mbp windows.

814

815 **Additional File S3.** Sex-specific SNPs identified from the regional analysis of the whole-genome  
816 sequence data, shown per genomic coordinate as a 0 (ref/ref) or 1 (ref/alt) for each sexed northern pike  
817 from Chatanika River.



818

## REFERENCES

819

- 820 Arima Genomics. (2023). Arima Genomics. Retrieved from <https://arimagenomics.com>
- 821 Aury, J-M, Engelen, S, Istace, B, Monat, C, Lasserre-Zuber, P, Belser, C, et al. (2022). Long-read and  
822 chromosome-scale assembly of the hexaploid wheat genome achieves high resolution for research  
823 and breeding. *GigaScience*, 11. doi:10.1093/gigascience/giac034
- 824 Auton, A, Abecasis, GR, Altshuler, DM, Durbin, RM, Abecasis, GR, Bentley, DR, et al. (2015). A global  
825 reference for human genetic variation. *Nature*, 526(7571), 68-74. doi:10.1038/nature15393
- 826 Bachevskaja, LT, Pereverzeva, VV, Agapova, GA, & Grunin, SI. (2019). Genetic diversity of the  
827 population of northern pike *Esox lucius* L. from the rivers of the northeastern part of Russia.  
828 *Biology Bulletin*, 46(2), 154-160. doi:10.1134/S1062359019020031
- 829 Barrett, RDH, & Schluter, D. (2008). Adaptation from standing genetic variation. *Trends in Ecology &*  
830 *Evolution*, 23(1), 38-44. doi:10.1016/j.tree.2007.09.008
- 831 Bernatchez, L, & Wilson, CC. (1998). Comparative phylogeography of Nearctic and Palearctic fishes.  
832 *Molecular Ecology*, 7(4), 431-452. doi:<https://doi.org/10.1046/j.1365-294x.1998.00319.x>
- 833 Bohling, J. (2020). Evaluating the effect of reference genome divergence on the analysis of empirical  
834 RADseq datasets. *Ecology and Evolution*, 10(14), 7585-7601.  
835 doi:<https://doi.org/10.1002/ece3.6483>
- 836 Bongartz, P. (2019). Resolving repeat families with long reads. *BMC Bioinformatics*, 20(1), 232.  
837 doi:10.1186/s12859-019-2807-4
- 838 Bosworth, A, & Farrell, JM. (2006). Genetic divergence among northern pike from spawning locations in  
839 the upper St. Lawrence River. *North American Journal of Fisheries Management*, 26(3), 676-  
840 684. doi:10.1577/M05-060.1
- 841 Broad Institute. (2023). Picard toolkit. In. GitHub Respository.
- 842 Broman, KW, Murray, JC, Sheffield, VC, White, RL, & Weber, JL. (1998). Comprehensive human  
843 genetic maps: individual and sex-specific variation in recombination. *The American Journal of*  
844 *Human Genetics*, 63(3), 861-869. doi:10.1086/302011
- 845 Carbine, WF. (1942). Observations on the life history of the northern pike, *Esox lucius* L., in Houghton  
846 Lake, Michigan. *Transactions of the American Fisheries Society*, 71(1), 149-164.  
847 doi:[https://doi.org/10.1577/1548-8659\(1941\)71\[149:OOTLHO\]2.0.CO;2](https://doi.org/10.1577/1548-8659(1941)71[149:OOTLHO]2.0.CO;2)
- 848 Carim, KJ, Caleb Dysthe, J, McLellan, H, Young, MK, McKelvey, KS, & Schwartz, MK. (2019). Using  
849 environmental DNA sampling to monitor the invasion of nonnative *Esox lucius* (northern pike) in  
850 the Columbia River basin, USA. *Environmental DNA*, 1(3), 215-226.  
851 doi:<https://doi.org/10.1002/edn3.22>
- 852 Carim, KJ, Eby, LA, Miller, LM, McLellan, H, Dupuis, V, & Schwartz, MK. (2022). Mechanism of  
853 northern pike invasion in the Columbia River Basin. *Management of Biological Invasions*, 13(1).
- 854 Casselman, JM. (1975). Sex ratios of northern pike, *Esox lucius* Linnaeus. *Transactions of the American*  
855 *Fisheries Society*, 104(1), 60-63. doi:10.1577/1548-8659(1975)104<60:SRONPE>2.0.CO;2
- 856 CCAC. (2005). Canadian Council on Animal Care guidelines on: the care and use of fish in research,  
857 teaching and testing. In (pp. 94). Ottawa, Ontario: Canadian Council on Animal Care.
- 858 Chaisson, MJP, Wilson, RK, & Eichler, EE. (2015). Genetic variation and the *de novo* assembly of  
859 human genomes. *Nature Reviews Genetics*, 16(11), 627-640. doi:10.1038/nrg3933
- 860 Charlesworth, B. (1991). The evolution of sex chromosomes. *Science*, 251(4997), 1030-1033.
- 861 Charlesworth, D, & Charlesworth, B. (2005). Sex chromosomes: evolution of the weird and wonderful.  
862 *Current Biology*, 15(4), R129-R131. doi:<https://doi.org/10.1016/j.cub.2005.02.011>
- 863 Chin, C-S, Alexander, DH, Marks, P, Klammer, AA, Drake, J, Heiner, C, et al. (2013). Nonhybrid,  
864 finished microbial genome assemblies from long-read SMRT sequencing data. *Nature Methods*,  
865 10(6), 563-569. doi:10.1038/nmeth.2474

- 866 Clark, CF. (1950). Observations on the spawning habits of the northern pike, *Esox lucius*, in  
867 Northwestern Ohio. *Copeia*, 1950(4), 285-288. doi:10.2307/1437909
- 868 Craig, JF. (2008). A short review of pike ecology. *Hydrobiologia*, 601(1), 5-16. doi:10.1007/s10750-007-  
869 9262-3
- 870 Crossman, EJ, & Harington, CR. (1970). Pleistocene pike, *Esox lucius*, and *Esox* sp., from the Yukon  
871 Territory and Ontario. *Canadian Journal of Earth Sciences*, 7(4), 1130-1138. doi:10.1139/e70-  
872 107
- 873 Danecek, P, Auton, A, Abecasis, G, Albers, CA, Banks, E, DePristo, MA, et al. (2011). The variant call  
874 format and VCFtools. *Bioinformatics*, 27(15), 2156-2158. doi:10.1093/bioinformatics/btr330
- 875 Danecek, P, Bonfield, JK, Liddle, J, Marshall, J, Ohan, V, Pollard, MO, et al. (2021). Twelve years of  
876 SAMtools and BCFtools. *GigaScience*, 10(2). doi:10.1093/gigascience/giab008
- 877 Dekker, J, Rippe, K, Dekker, M, & Kleckner, N. (2002). Capturing chromosome conformation. *Science*,  
878 295(5558), 1306-1311. doi:doi:10.1126/science.1067799
- 879 DePristo, MA, Banks, E, Poplin, R, Garimella, KV, Maguire, JR, Hartl, C, et al. (2011). A framework for  
880 variation discovery and genotyping using next-generation DNA sequencing data. *Nature*  
881 *Genetics*, 43(5), 491-498. doi:10.1038/ng.806
- 882 Devlin, RH, & Nagahama, Y. (2002). Sex determination and sex differentiation in fish: an overview of  
883 genetic, physiological, and environmental influences. *Aquaculture*, 208(3), 191-364.  
884 doi:[https://doi.org/10.1016/S0044-8486\(02\)00057-1](https://doi.org/10.1016/S0044-8486(02)00057-1)
- 885 DFO. (2012). *2010 Survey of recreational fishing in Canada*. Economic Analysis and Statistics Strategic  
886 Policy Retrieved from <http://www.dfo-mpo.gc.ca/stats/rec/can/2010/index-eng.htm>.
- 887 Dudchenko, O, Batra, SS, Omer, AD, Nyquist, SK, Hoeger, M, Durand, NC, et al. (2017). *De novo*  
888 assembly of the *Aedes aegypti* genome using Hi-C yields chromosome-length scaffolds. *Science*,  
889 356(6333), 92-95. doi:doi:10.1126/science.aal3327
- 890 Durand, NC, Robinson, JT, Shamim, MS, Machol, I, Mesirov, JP, Lander, ES, et al. (2016). Juicebox  
891 provides a visualization system for Hi-C contact maps with unlimited zoom. *Cell Systems*, 3(1),  
892 99-101. doi:<https://doi.org/10.1016/j.cels.2015.07.012>
- 893 Durand, NC, Shamim, MS, Machol, I, Rao, SSP, Huntley, MH, Lander, ES, et al. (2016). Juicer provides  
894 a one-click system for analyzing loop-resolution Hi-C experiments. *Cell Systems*, 3(1), 95-98.  
895 doi:10.1016/j.cels.2016.07.002
- 896 Eid, J, Fehr, A, Gray, J, Luong, K, Lyle, J, Otto, G, et al. (2009). Real-time DNA sequencing from single  
897 polymerase molecules. *Science*, 323(5910), 133-138. doi:10.1126/science.1162986
- 898 Eschbach, E, Nolte, AW, Kohlmann, K, Alós, J, Schöning, S, & Arlinghaus, R. (2021). Genetic  
899 population structure of a top predatory fish (northern pike, *Esox lucius*) covaries with  
900 anthropogenic alteration of freshwater ecosystems. *Freshwater Biology*, 66(5), 884-901.  
901 doi:<https://doi.org/10.1111/fwb.13684>
- 902 Farrell, JM, & Barry, CC. (2012). *Northern pike monitoring and management in the upper St. Lawrence*  
903 *River*. Retrieved from
- 904 Forsman, A, Tibblin, P, Berggren, H, Nordahl, O, Koch-Schmidt, P, & Larsson, P. (2015). Pike *Esox*  
905 *lucius* as an emerging model organism for studies in ecology and evolutionary biology: a review.  
906 *Journal of Fish Biology*, 87(2), 472-479. doi:<https://doi.org/10.1111/jfb.12712>
- 907 Gao, G, Nome, T, Pearse, DE, Moen, T, Naish, KA, Thorgaard, GH, et al. (2018). A new single  
908 nucleotide polymorphism database for rainbow trout generated through whole genome  
909 resequencing. *Frontiers in Genetics*, 9. doi:10.3389/fgene.2018.00147
- 910 Ghurye, J, Pop, M, Koren, S, Bickhart, D, & Chin, C-S. (2017). Scaffolding of long read assemblies using  
911 long range contact information. *BMC Genomics*, 18(1), 527. doi:10.1186/s12864-017-3879-z
- 912 Ghurye, J, Rhie, A, Walenz, BP, Schmitt, A, Selvaraj, S, Pop, M, et al. (2019). Integrating Hi-C links  
913 with assembly graphs for chromosome-scale assembly. *PLOS Computational Biology*, 15(8),  
914 e1007273. doi:10.1371/journal.pcbi.1007273

- 915 Goodwin, S, Gurtowski, J, Ethe-Sayers, S, Deshpande, P, Schatz, MC, & McCombie, WR. (2015).  
916 Oxford Nanopore sequencing, hybrid error correction, and *de novo* assembly of a eukaryotic  
917 genome. *Genome Res*, 25(11), 1750-1756. doi:10.1101/gr.191395.115
- 918 Goto-Kazeto, R, Abe, Y, Masai, K, Yamaha, E, Adachi, S, & Yamauchi, K. (2006). Temperature-  
919 dependent sex differentiation in goldfish: Establishing the temperature-sensitive period and effect  
920 of constant and fluctuating water temperatures. *Aquaculture*, 254(1), 617-624.  
921 doi:<https://doi.org/10.1016/j.aquaculture.2005.10.009>
- 922 Grande, T, Laten, H, & López, JA. (2004). Phylogenetic relationships of extant Esocid species (Teleostei:  
923 Salmoniformes) based on morphological and molecular characters. *Copeia*, 2004(4), 743-757,  
924 715.
- 925 Gruber, B, Unmack, PJ, Berry, OF, & Georges, A. (2018). dart: An R package to facilitate analysis of  
926 SNP data generated from reduced representation genome sequencing. *Molecular Ecology*  
927 *Resources*, 18(3), 691-699. doi:<https://doi.org/10.1111/1755-0998.12745>
- 928 Harris, RS. (2007). *Improved pairwise alignment of genomic DNA*. (Ph.D.), The Pennsylvania State  
929 University, Pennsylvania. Retrieved from  
930 [https://www.bx.psu.edu/~rsharris/rsharris\\_phd\\_thesis\\_2007.pdf](https://www.bx.psu.edu/~rsharris/rsharris_phd_thesis_2007.pdf)
- 931 Harvey, B. (2009). *A biological synopsis of northern pike (Esox lucius)*. Canadian Manuscript Report of  
932 Fisheries and Aquatic Sciences.
- 933 Hedrick, PW. (2005). Tests of the neutral theory and evidence of selection: Tajima test. In *Genetics of*  
934 *populations* (3 ed., pp. 433-436). Sudbury, Massachusetts: Jones and Bartlett Publishers.
- 935 Höglund, J. (2009). *Evolutionary Conservation Genetics*. Oxford, United Kingdom: Oxford University  
936 Press.
- 937 Huffman, K, Farrell, JM, & Whipps, CM. (2014). *Environmental determinants of sex ratio in St.*  
938 *Lawrence River northern pike: development of a molecular sex identification tool and*  
939 *experimentation with physical and chemical variables*. Paper presented at the American Fisheries  
940 Society (AFS), Quebec City, QC. <https://afs.confex.com/afs/2014/webprogram/Paper16111.html>
- 941 Jackman, SD, Coombe, L, Chu, J, Warren, RL, Vandervalk, BP, Yeo, S, et al. (2018). Tigmint: correcting  
942 assembly errors using linked reads from large molecules. *BMC Bioinformatics*, 19(1), 393.  
943 doi:10.1186/s12859-018-2425-6
- 944 Jombart, T. (2008). adegenet: a R package for the multivariate analysis of genetic markers.  
945 *Bioinformatics*, 24(11), 1403-1405. doi:10.1093/bioinformatics/btn129
- 946 Jombart, T, & Ahmed, I. (2011). adegenet 1.3-1: new tools for the analysis of genome-wide SNP data.  
947 *Bioinformatics*, 27(21), 3070-3071. doi:10.1093/bioinformatics/btr521
- 948 Kamvar, ZN, Tabima, JF, & Grünwald, NJ. (2014). poppr: an R package for genetic analysis of  
949 populations with clonal, partially clonal, and/or sexual reproduction. *PeerJ*, 2, e281.  
950 doi:10.7717/peerj.281
- 951 Kearse, M, Moir, R, Wilson, A, Stones-Havas, S, Cheung, M, Sturrock, S, et al. (2012). Geneious Basic:  
952 An integrated and extendable desktop software platform for the organization and analysis of  
953 sequence data. *Bioinformatics*, 28(12), 1647-1649. doi:10.1093/bioinformatics/bts199
- 954 Knaus, BJ, & Grünwald, NJ. (2017). vcfr: a package to manipulate and visualize variant call format data  
955 in R. *Molecular Ecology Resources*, 17(1), 44-53. doi:<https://doi.org/10.1111/1755-0998.12549>
- 956 Koren, S, Schatz, MC, Walenz, BP, Martin, J, Howard, JT, Ganapathy, G, et al. (2012). Hybrid error  
957 correction and *de novo* assembly of single-molecule sequencing reads. *Nature Biotechnology*,  
958 30(7), 693-700. doi:10.1038/nbt.2280
- 959 Koren, S, Walenz, BP, Berlin, K, Miller, JR, Bergman, NH, & Phillippy, AM. (2017). Canu: scalable and  
960 accurate long-read assembly via adaptive k-mer weighting and repeat separation. *Genome Res*,  
961 27(5), 722-736. doi:10.1101/gr.215087.116
- 962 Lee, T-H, Guo, H, Wang, X, Kim, C, & Paterson, AH. (2014). SNPhylo: a pipeline to construct a  
963 phylogenetic tree from huge SNP data. *BMC Genomics*, 15(1), 162. doi:10.1186/1471-2164-15-  
964 162

- 965 Leong, JS, Jantzen, SG, von Schalburg, KR, Cooper, GA, Messmer, AM, Liao, NY, et al. (2010). *Salmo*  
966 *salar* and *Esox lucius* full-length cDNA sequences reveal changes in evolutionary pressures on a  
967 post-tetraploidization genome. *BMC Genomics*, 11(1), 279. doi:10.1186/1471-2164-11-279
- 968 Li, H. (2013). Aligning sequence reads, clone sequences and assembly contigs with BWA-MEM,  
969 arXiv:1303.3997. Retrieved from <https://ui.adsabs.harvard.edu/abs/2013arXiv1303.3997L>
- 970 Li, H. (2017). Bioawk. In: GitHub.
- 971 Li, H, Handsaker, B, Wysoker, A, Fennell, T, Ruan, J, Homer, N, et al. (2009). The sequence  
972 alignment/map format and SAMtools. *Bioinformatics*, 25(16), 2078-2079.  
973 doi:10.1093/bioinformatics/btp352
- 974 Luan, P, Huo, T, Ma, B, Song, D, Zhang, X, & Hu, G. (2021). Genomic inbreeding and population  
975 structure of northern pike (*Esox lucius*) in Xinjiang, China. *Ecology and Evolution*, 11(10), 5657-  
976 5668. doi:<https://doi.org/10.1002/ece3.7469>
- 977 Mackay, TFC. (2001). The genetic architecture of quantitative traits. *Annual Review of Genetics*, 35(1),  
978 303-339. doi:10.1146/annurev.genet.35.102401.090633
- 979 Marçais, G, & Kingsford, C. (2011). A fast, lock-free approach for efficient parallel counting of  
980 occurrences of k-mers. *Bioinformatics*, 27(6), 764-770. doi:10.1093/bioinformatics/btr011
- 981 Martínez Barrio, A, Lamichhaney, S, Fan, G, Rafati, N, Pettersson, M, Zhang, H, et al. (2016). The  
982 genetic basis for ecological adaptation of the Atlantic herring revealed by genome sequencing.  
983 *eLife*, 5, e12081. doi:10.7554/eLife.12081
- 984 McKenna, A, Hanna, M, Banks, E, Sivachenko, A, Cibulskis, K, Kernytsky, A, et al. (2010). The  
985 Genome Analysis Toolkit: a MapReduce framework for analyzing next-generation DNA  
986 sequencing data. *Genome Res*, 20(9), 1297-1303. doi:10.1101/gr.107524.110
- 987 Miller, LM, & Kapuscinski, AR. (1996). Notes: Microsatellite DNA markers reveal new levels of genetic  
988 variation in northern pike. *Transactions of the American Fisheries Society*, 125(6), 971-977.  
989 doi:10.1577/1548-8659(1996)125<0971:NMDMRN>2.3.CO;2
- 990 Miller, LM, & Senanan, W. (2003). A review of northern pike population genetics research and its  
991 implications for management. *North American Journal of Fisheries Management*, 23(1), 297-306.  
992 doi:[https://doi.org/10.1577/1548-8675\(2003\)023<0297:ARONPP>2.0.CO;2](https://doi.org/10.1577/1548-8675(2003)023<0297:ARONPP>2.0.CO;2)
- 993 Moen, T, Hoyheim, B, Munck, H, & Gomez-Raya, L. (2004). A linkage map of Atlantic salmon (*Salmo*  
994 *salar*) reveals an uncommonly large difference in recombination rate between the sexes. *Animal*  
995 *Genetics*, 35(2), 81-92. doi:<https://doi.org/10.1111/j.1365-2052.2004.01097.x>
- 996 Moran, BM, & Anderson, EC. (2019). Bayesian inference from the conditional genetic stock  
997 identification model. *Canadian Journal of Fisheries and Aquatic Sciences*, 76(4), 551-560.  
998 doi:10.1139/cjfas-2018-0016
- 999 Mostovoy, Y, Levy-Sakin, M, Lam, J, Lam, ET, Hastie, AR, Marks, P, et al. (2016). A hybrid approach  
1000 for *de novo* human genome sequence assembly and phasing. *Nature Methods*, 13(7), 587-590.  
1001 doi:10.1038/nmeth.3865
- 1002 Nelson, TC, Crandall, JG, Ituarte, CM, Catchen, JM, & Cresko, WA. (2019). Selection, Linkage, and  
1003 Population Structure Interact To Shape Genetic Variation Among Threespine Stickleback  
1004 Genomes. *Genetics*, 212(4), 1367-1382. doi:10.1534/genetics.119.302261
- 1005 Nicod, J-C, Wang, YZ, Excoffier, L, & Largiadèr, CR. (2004). Low levels of mitochondrial DNA  
1006 variation among central and southern European *Esox lucius* populations. *Journal of Fish Biology*,  
1007 64(5), 1442-1449. doi:<https://doi.org/10.1111/j.0022-1112.2004.00397.x>
- 1008 Ouellet-Cauchon, G, Mingelbier, M, Lecomte, F, & Bernatchez, L. (2014). Landscape variability explains  
1009 spatial pattern of population structure of northern pike (*Esox lucius*) in a large fluvial system.  
1010 *Ecology and Evolution*, 4(19), 3723-3735. doi:<https://doi.org/10.1002/ece3.1121>
- 1011 Pan, Q, Feron, R, Jouanno, E, Darras, H, Herpin, A, Koop, B, et al. (2021). The rise and fall of the ancient  
1012 northern pike master sex-determining gene. *eLife*, 10, e62858. doi:10.7554/eLife.62858
- 1013 Pan, Q, Feron, R, Yano, A, Guyomard, R, Jouanno, E, Vigouroux, E, et al. (2019). Identification of the  
1014 master sex determining gene in northern pike (*Esox lucius*) reveals restricted sex chromosome  
1015 differentiation. *PLOS Genetics*, 15(8), e1008013. doi:10.1371/journal.pgen.1008013



- 1016 Pan, Q, Herpin, A, & Guiguen, Y. (2023). Inactivation of the anti-Müllerian hormone receptor type 2  
1017 (*amhrII*) gene in northern pike (*Esox lucius*) results in male-to-female sex reversal. *Sexual*  
1018 *Development*, 16(4), 289-294. doi:10.1159/000521003
- 1019 Piertney, SB, & Oliver, MK. (2006). The evolutionary ecology of the major histocompatibility complex.  
1020 *Heredity*, 96(1), 7-21. doi:10.1038/sj.hdy.6800724
- 1021 Poplin, R, Ruano-Rubio, V, DePristo, MA, Fennell, TJ, Carneiro, MO, Auwera, GAVd, et al. (2018).  
1022 Scaling accurate genetic variant discovery to tens of thousands of samples. *bioRxiv*, 201178.  
1023 doi:10.1101/201178
- 1024 Priegel, GR, & Krohn, DC. (1975). *Characteristics of a northern pike spawning population*. Madison,  
1025 Wisconsin: Madison, Wisconsin: Wisconsin Department of Natural Resources Retrieved from  
1026 <https://search.library.wisc.edu/digital/AMHTIK6R4JXFCA8F>.
- 1027 Purcell, S, Neale, B, Todd-Brown, K, Thomas, L, Ferreira, MA, Bender, D, et al. (2007). PLINK: a tool  
1028 set for whole-genome association and population-based linkage analyses. *Am J Hum Genet*,  
1029 81(3), 559-575. doi:10.1086/519795
- 1030 Putnam, NH, O'Connell, BL, Stites, JC, Rice, BJ, Blanchette, M, Calef, R, et al. (2016). Chromosome-  
1031 scale shotgun assembly using an *in vitro* method for long-range linkage. *Genome Research*,  
1032 26(3), 342-350. doi:10.1101/gr.193474.115
- 1033 Quinlan, AR, & Hall, IM. (2010). BEDTools: a flexible suite of utilities for comparing genomic features.  
1034 *Bioinformatics*, 26(6), 841-842. doi:10.1093/bioinformatics/btq033
- 1035 R Core Team. (2023). R: A Language and Environment for Statistical Computing. In. Vienna, Austria.
- 1036 Rajendiran, P, Jaafar, F, Kar, S, Sudhakumari, C, Senthilkumaran, B, & Parhar, IS. (2021). Sex  
1037 determination and differentiation in Teleost: roles of genetics, environment, and brain. *Biology*  
1038 (*Basel*), 10(10). doi:10.3390/biology10100973
- 1039 Rambaut, A. (2016). Figtree (v.1.4.3). Retrieved from <http://tree.bio.ed.ac.uk/software/figtree/>
- 1040 Redon, R, Ishikawa, S, Fitch, KR, Feuk, L, Perry, GH, Andrews, TD, et al. (2006). Global variation in  
1041 copy number in the human genome. *Nature*, 444(7118), 444-454. doi:10.1038/nature05329
- 1042 Robinson, JT, Turner, D, Durand, NC, Thorvaldsdóttir, H, Mesirov, JP, & Aiden, EL. (2018). Juicebox.js  
1043 provides a cloud-based visualization system for Hi-C data. *Cell Syst*, 6(2), 256-258.e251.  
1044 doi:10.1016/j.cels.2018.01.001
- 1045 Rondeau, EB, Minkley, DR, Leong, JS, Messmer, AM, Jantzen, JR, von Schalburg, KR, et al. (2014).  
1046 The genome and linkage map of the northern pike (*Esox lucius*): conserved synteny revealed  
1047 between the salmonid sister group and the Neoteleostei. *PLOS ONE*, 9(7), e102089.  
1048 doi:10.1371/journal.pone.0102089
- 1049 Rougemont, Q, Carrier, A, Le Luyer, J, Ferchaud, A-L, Farrell, JM, Hatin, D, et al. (2019). Combining  
1050 population genomics and forward simulations to investigate stocking impacts: A case study of  
1051 Muskellunge (*Esox masquinongy*) from the St. Lawrence River basin. *Evolutionary Applications*,  
1052 12(5), 902-922. doi:<https://doi.org/10.1111/eva.12765>
- 1053 Sakamoto, T, Danzmann, RG, Gharbi, K, Howard, P, Ozaki, A, Khoo, SK, et al. (2000). A microsatellite  
1054 linkage map of rainbow trout (*Oncorhynchus mykiss*) characterized by large sex-specific  
1055 differences in recombination rates. *Genetics*, 155(3), 1331-1345. doi:10.1093/genetics/155.3.1331
- 1056 Seeb, JE, Seeb, LW, Oates, DW, & Utter, FM. (1987). Genetic variation and postglacial dispersal of  
1057 populations of northern pike (*Esox lucius*) in North America. *Canadian Journal of Fisheries and*  
1058 *Aquatic Sciences*, 44(3), 556-561. doi:10.1139/f87-068
- 1059 Senanan, W, & Kapuscinski, AR. (2000). Genetic relationships among populations of northern pike (*Esox*  
1060 *lucius*). *Canadian Journal of Fisheries and Aquatic Sciences*, 57(2), 391-404. doi:10.1139/f99-  
1061 261
- 1062 Seppy, M, Manni, M, & Zdobnov, EM. (2019). BUSCO: assessing genome assembly and annotation  
1063 completeness. In M. Kollman (Ed.), *Gene Prediction: Methods and Protocols* (pp. 227-245):  
1064 Springer.

- 1065 Skog, A, Vøllestad, LA, Stenseth, NC, Kasumyan, A, & Jakobsen, KS. (2014). Circumpolar  
1066 phylogeography of the northern pike (*Esox lucius*) and its relationship to the Amur pike (*E.*  
1067 *reichertii*). *Frontiers in Zoology*, 11(1), 67. doi:10.1186/s12983-014-0067-8
- 1068 Skov, C, & Nilsson, PA. (2018). *Biology and Ecology of Pike* (1 ed.). Boca Raton: CRC Press.
- 1069 Star, B, Nederbragt, AJ, Jentoft, S, Grimholt, U, Malmstrøm, M, Gregers, TF, et al. (2011). The genome  
1070 sequence of Atlantic cod reveals a unique immune system. *Nature*, 477(7363), 207-210.  
1071 doi:10.1038/nature10342
- 1072 Stoddart, D, Heron, AJ, Mikhailova, E, Maglia, G, & Bayley, H. (2009). Single-nucleotide discrimination  
1073 in immobilized DNA oligonucleotides with a biological nanopore. *Proceedings of the National*  
1074 *Academy of Sciences*, 106(19), 7702-7707. doi:doi:10.1073/pnas.0901054106
- 1075 Sun, H, Jiao, W-B, Krause, K, Campoy, JA, Goel, M, Folz-Donahue, K, et al. (2022). Chromosome-scale  
1076 and haplotype-resolved genome assembly of a tetraploid potato cultivar. *Nature Genetics*, 54(3),  
1077 342-348. doi:10.1038/s41588-022-01015-0
- 1078 Sunde, J, Yıldırım, Y, Tibblin, P, Bekkevold, D, Skov, C, Nordahl, O, et al. (2022). Drivers of neutral and  
1079 adaptive differentiation in pike (*Esox lucius*) populations from contrasting environments.  
1080 *Molecular Ecology*, 31(4), 1093-1110. doi:<https://doi.org/10.1111/mec.16315>
- 1081 Sutherland, BJG, Rico, C, Audet, C, & Bernatchez, L. (2017). Sex chromosome evolution,  
1082 heterochiasmy, and physiological QTL in the salmonid brook charr *Salvelinus fontinalis*. *G3*  
1083 *Genes|Genomes|Genetics*, 7(8), 2749-2762. doi:10.1534/g3.117.040915
- 1084 Tajima, F. (1989). Statistical method for testing the neutral mutation hypothesis by DNA polymorphism.  
1085 *Genetics*, 123(3), 585-595. doi:10.1093/genetics/123.3.585
- 1086 Thorburn, D-MJ, Sagonas, K, Binzer-Panchal, M, Chain, FJJ, Feulner, PGD, Bornberg-Bauer, E, et al.  
1087 (2023). Origin matters: Using a local reference genome improves measures in population  
1088 genomics. *Molecular Ecology Resources*, n/a(n/a). doi:<https://doi.org/10.1111/1755-0998.13838>
- 1089 Turner, SD. (2014). qqman: an R package for visualizing GWAS results using Q-Q and manhattan plots.  
1090 *bioRxiv*, 005165. doi:10.1101/005165
- 1091 Unanue, ER, Turk, V, & Neefjes, J. (2016). Variations in MHC class II antigen processing and  
1092 presentation in health and disease. *Annu Rev Immunol*, 34, 265-297. doi:10.1146/annurev-  
1093 immunol-041015-055420
- 1094 Van der Auwera, GA, Carneiro, MO, Hartl, C, Poplin, R, Del Angel, G, Levy-Moonshine, A, et al.  
1095 (2013). From FastQ data to high confidence variant calls: the Genome Analysis Toolkit best  
1096 practices pipeline. *Curr Protoc Bioinformatics*, 43(1110), 11.10.11-11.10.33.  
1097 doi:10.1002/0471250953.bi1110s43
- 1098 Walker, BJ, Abeel, T, Shea, T, Priest, M, Abouelliel, A, Sakthikumar, S, et al. (2014). Pilon: an integrated  
1099 tool for comprehensive microbial variant detection and genome assembly improvement. *PLOS*  
1100 *ONE*, 9(11), e112963. doi:10.1371/journal.pone.0112963
- 1101 Warren, RL, Yang, C, Vandervalk, BP, Behsaz, B, Lagman, A, Jones, SJM, et al. (2015). LINKS:  
1102 scalable, alignment-free scaffolding of draft genomes with long reads. *GigaScience*, 4(1), 35.  
1103 doi:10.1186/s13742-015-0076-3
- 1104 Wickham, H. (2016). *ggplot2: elegant graphics for data analysis*: Springer-Verlag New York.
- 1105 Wickham, H, François, R, Henry, L, Müller, K, & Vaughan, D. (2023). dplyr: a grammar of data  
1106 manipulation. Retrieved from <https://github.com/tidyverse/dplyr>
- 1107 Wilson, MVH. (1980). Oldest known *Esox* (Pisces: Esocidae), part of a new Paleocene teleost fauna from  
1108 western Canada. *Canadian Journal of Earth Sciences*, 17(3), 307-312. doi:10.1139/e80-030
- 1109 Wilson, MVH, Brinkman, DB, & Neuman, AG. (1992). Cretaceous Esocoidei (Teleostei): early radiation  
1110 of the pikes in North American fresh waters. *Journal of Paleontology*, 66(5), 839-846.  
1111 doi:10.1017/S0022336000020849
- 1112 Wooller, MJ, Gaglioti, B, Fulton, TL, Lopez, A, & Shapiro, B. (2015). Post-glacial dispersal patterns of  
1113 Northern pike inferred from an 8800 year old pike (*Esox cf. lucius*) skull from interior Alaska.  
1114 *Quaternary Science Reviews*, 120, 118-125. doi:<https://doi.org/10.1016/j.quascirev.2015.04.027>



- 1115 Yeo, S, Coombe, L, Warren, RL, Chu, J, & Birol, I. (2017). ARCS: scaffolding genome drafts with linked  
1116 reads. *Bioinformatics*, 34(5), 725-731. doi:10.1093/bioinformatics/btx675  
1117 Yuan, Y, Scheben, A, Edwards, D, & Chan, TF. (2021). Toward haplotype studies in polyploid plants to  
1118 assist breeding. *Mol Plant*, 14(12), 1969-1972. doi:10.1016/j.molp.2021.11.004  
1119
